# Supplementary material
Source: Royal Society of Chemistry journal article supplement (doi:10.1039/d6gc01624c)

## Supporting Information

### Novel Benzenesulfonamide Based-Ionic Liquids for Energy-efficient CO<sub>2</sub> Capture and Conversion

Yangyang Jiang,<sup>† b</sup> YuXin Liu,<sup>† a</sup> Yuanli Qi,<sup>a</sup> Yurou Shao,<sup>a</sup> Dong Wang,<sup>b</sup> Benshuai Guo,<sup>b</sup> Jingyan Zhao,<sup>b</sup> Zhibin Zhou,<sup>b</sup> Yuntao Lei <sup>\*a</sup> and Lili Jin<sup>\*a</sup>

<sup>a</sup> *School of Science, China Pharmaceutical University, Nanjing, 211198, Jiangsu, PR China*

<sup>b</sup> *Sinopec Nanjing Chemical Industries Co. Ltd., Nanjing, 211500, Jiangsu, PR China*

<sup>†</sup> These authors contributed equally to this work

\* Corresponding author: Tel: +86-025-86185172; E-mail: [jinlili@cpu.edu.cn](mailto:jinlili@cpu.edu.cn) (Lili Jin)

### 1. Preparation of [P<sub>66614</sub>] [p-MBSA]

An ethanol solution of [P<sub>66614</sub>][OH] was prepared according to the following procedure. The Amberlite RIRA402 Cl resin was immersed in a sodium hydroxide solution (concentration of 0.03 mol/L) for a duration of 3 days. Thereafter, the resin was filtered out, and then washed several times with deionised water until the filtrate was neutral, obtaining the hydroxide anion exchange resin. Then, at least three equivalents (based on the mass of [P<sub>66614</sub>] [Cl]) resin was loaded onto the column. Subsequently, the ethanol solution containing [P<sub>66614</sub>] [Cl] (15.58g, 30 mmol, 25 mL EtOH) was pass through the column, and the flow rate was controlled about less than 5 drops per min. After anion exchange had been performed twice, the fresh hydroxide anion exchange resin was replaced and the anion was exchanged again for a third time. The obtained [P<sub>66614</sub>] [OH] was determined the absence of remaining chloride ion by standard acidification and treatment with the silver nitrate. The concentration of [P<sub>66614</sub>] [OH] was determined by <sup>1</sup>H NMR. Then, an equivalent amount of *p*-toluenesulfonamide was introduced into the prepared solution and stirred at room temperature for 24 h. Subsequently, evaporated the solvent in vacuum and the obtained product was then dried under vacuum (-0.01 MPa) at 60 °C for 24 h to remove any possible traces of water, a colorless and viscous liquid was obtained.

### 2. Characterization data of BSA-ILs

(1) [P<sub>66614</sub>][p-MBSA]: <sup>1</sup>H NMR (300MHz, DMSO-*d*<sub>6</sub>): δ 7.61 (d, *J* = 8.2 Hz, 2H), 7.19 (d, *J* = 7.9 Hz, 2H), 2.32 (s, 3H), 2.26 - 2.11 (m, 7H), 1.59 - 1.15 (m, 50H), 0.87 (q, *J* = 6.7 Hz, 12H). <sup>13</sup>C NMR (75 MHz, DMSO-*d*<sub>6</sub>) δ 147.02, 139.27, 128.90, 125.71, 31.78, 30.89, 30.53, 30.33, 30.13, 29.50, 29.45, 29.20, 29.12, 28.57, 22.58, 22.30, 21.28, 21.04, 20.98, 18.23, 17.61, 14.43, 14.35. ESI-MS(*m/z*): calcd for C<sub>32</sub>H<sub>68</sub>P[M+H]<sup>+</sup>: 483.87; found: 483.51. ESI-MS(*m/z*): calcd for C<sub>7</sub>H<sub>8</sub>NO<sub>2</sub>S[M-H]<sup>-</sup>: 170.21; found: 170.03.

(2) [P<sub>4444</sub>][p-MBSA]: <sup>1</sup>H NMR (300 MHz, DMSO-*d*<sub>6</sub>): δ 7.53 (d, *J* = 8.0 Hz, 2H), 7.07 (d, *J* = 7.9 Hz, 2H), 2.28 (s, 3H), 2.26 - 2.10 (m, 8H), 1.40 (dd, *J* = 13.1, 5.7 Hz, 16H), 0.92 (t, *J* = 7.0 Hz, 12H). <sup>13</sup>C NMR (75 MHz, DMSO-*d*<sub>6</sub>) δ 150.97, 137.00, 128.24, 125.42, 23.94, 23.73, 23.21, 23.15, 21.19, 18.12, 17.49, 13.75. HR-MS(*m/z*):

calcd for  $C_{16}H_{36}P[M+H]^+$ : 259.44; found: 259.2543. HR-MS(m/z): calcd for  $C_7H_8NO_2S[M-H]^-$ : 170.21; found: 170.0275.

(3)  $[P_{4444}][BSA]$ :  $^1H$  NMR (400 MHz, DMSO- $d_6$ ):  $\delta$  7.72 (dd,  $J = 7.4, 2.2$  Hz, 2H), 7.41 - 7.32 (m, 3H), 2.29 - 2.12 (m, 6H), 1.52 - 1.32 (m, 12H), 0.91 (t,  $J = 7.0$  Hz, 9H).  $^{13}C$  NMR (101 MHz, DMSO- $d_6$ )  $\delta$  153.74, 127.81, 127.73, 125.33, 23.91, 23.76, 23.27, 23.23, 18.09, 17.62, 13.73. ESI-MS(m/z): calcd for  $C_{16}H_{36}P[M+H]^+$ : 259.44; found: 259.26. ESI-MS(m/z): calcd for  $C_6H_6NO_2S[M-H]^-$ : 156.18; found: 156.01.

(4)  $[P_{4444}][p-MOBSA]$ :  $^1H$  NMR (300 MHz, DMSO- $d_6$ ):  $\delta$  7.61 - 7.53 (m, 2H), 6.85 - 6.77 (m, 2H), 3.74 (s, 3H), 2.29 - 2.10 (m, 8H), 1.55 - 1.31 (m, 16H), 0.92 (d,  $J = 6.9$  Hz, 12H).  $^{13}C$  NMR (101 MHz, DMSO- $d_6$ )  $\delta$  160.01, 142.71, 127.33, 113.40, 55.71, 23.92, 23.77, 23.12, 17.99, 17.52, 13.76. HR-MS(m/z): calcd for  $C_{16}H_{36}P[M+H]^+$ : 259.44; found: 259.2537. HR-MS(m/z): calcd for  $C_7H_8NO_3S[M-H]^-$ : 186.21; found: 186.0235.

(5)  $[P_{4444}][p-CBSA]$ :  $^1H$  NMR (400 MHz, DMSO- $d_6$ ):  $\delta$  7.64 (d,  $J = 8.4$  Hz, 2H), 7.34 - 7.29 (m, 2H), 2.26 - 2.12 (m, 8H), 1.42 (tq,  $J = 15.4, 8.9, 8.3$  Hz, 17H), 0.91 (t,  $J = 7.0$  Hz, 13H).  $^{13}C$  NMR (101 MHz, DMSO- $d_6$ ):  $\delta$  152.72, 132.27, 127.78, 127.35, 23.91, 23.76, 23.11, 18.03, 17.56, 13.74. HR-MS(m/z): calcd for  $C_{16}H_{36}P[M+H]^+$ : 259.44; found: 259.2537. HR-MS(m/z): calcd for  $C_6H_5ClNO_2S[M-H]^-$ : 190.62; found: 189.9733.

(6)  $[P_{4444}][o-NBSA]$ :  $^1H$  NMR (400 MHz, DMSO- $d_6$ ):  $\delta$  7.92 (dd,  $J = 7.4, 2.2$  Hz, 1H), 7.64 - 7.57 (m, 2H), 7.53 - 7.48 (m, 1H), 2.26 - 2.13 (m, 8H), 1.43 (ddq,  $J = 27.5, 14.0, 6.6, 6.1$  Hz, 16H), 0.91 (t,  $J = 7.0$  Hz, 12H).  $^{13}C$  NMR (101 MHz, DMSO- $d_6$ )  $\delta$  147.76, 143.41, 131.80, 130.03, 128.76, 123.34, 23.92, 23.76, 23.13, 18.00, 17.53, 13.75. ESI-MS(m/z): calcd for  $C_{16}H_{36}P[M+H]^+$ : 259.44; found: 259.26. ESI-MS(m/z): calcd for  $C_6H_5N_2O_4S[M-H]^-$ : 201.18; found: 201.00.

(7)  $[P_{4444}][p-ABSAs]$ :  $^1H$  NMR (300 MHz, DMSO- $d_6$ ):  $\delta$  7.35 - 7.26 (m, 2H), 6.45 - 6.36 (m, 2H), 5.08 (s, 2H), 2.28 - 2.09 (m, 8H), 1.44 (tp,  $J = 14.1, 7.0$  Hz, 16H), 0.92 (t,  $J = 7.0$  Hz, 12H).  $^{13}C$  NMR (101 MHz, DMSO- $d_6$ )  $\delta$  148.59, 141.74, 126.60, 112.56, 23.91, 23.76, 23.18, 23.13, 18.04, 17.56, 13.76. HR-MS(m/z): calcd for  $C_{16}H_{36}P[M+H]^+$ : 259.44; found: 259.2557. HR-MS(m/z): calcd for  $C_6H_7N_2O_2S[M-H]^-$ :

171.19; found: 171.0231.

(8) [N<sub>4 4 4 4</sub>][*p*-MBSA]: <sup>1</sup>H NMR (300 MHz, DMSO-*d*<sub>6</sub>): δ 7.52 (d, *J* = 8.0 Hz, 2H), 7.07 (d, *J* = 8.0 Hz, 2H), 2.28 (s, 3H), 1.55 (dd, *J* = 16.0, 8.5 Hz, 8H), 1.31 (h, *J* = 7.2 Hz, 8H), 0.92 (d, *J* = 7.4 Hz, 12H). <sup>13</sup>C NMR (101 MHz, DMSO-*d*<sub>6</sub>) δ 136.91, 128.26, 125.42, 23.52, 21.20, 19.68, 13.98. HR-MS(*m/z*): calcd for C<sub>16</sub>H<sub>36</sub>N[M+H]<sup>+</sup>: 242.47; found: 242.2849. HR-MS(*m/z*): calcd for C<sub>7</sub>H<sub>8</sub>NO<sub>2</sub>S[M-H]<sup>-</sup>: 170.21; found: 170.0282.

(9) [N<sub>1 1 1 C<sub>2</sub>OH</sub>][*p*-MBSA]: <sup>1</sup>H NMR (400 MHz, DMSO-*d*<sub>6</sub>): δ 7.54 (d, *J* = 8.1 Hz, 2H), 7.09 (d, *J* = 7.9 Hz, 2H), 3.86 - 3.80 (m, 2H), 3.44 - 3.38 (m, 2H), 3.11 (s, 9H), 2.28 (s, 3H). <sup>13</sup>C NMR (101 MHz, DMSO-*d*<sub>6</sub>) δ 149.91, 137.64, 128.52, 125.42, 67.54, 55.28, 53.56, 53.49, 40.44, 21.22. HR-MS(*m/z*): calcd for C<sub>5</sub>H<sub>14</sub>NO[M+H]<sup>+</sup>: 104.17; found: 104.1067. HR-MS(*m/z*): calcd for C<sub>7</sub>H<sub>8</sub>NO<sub>2</sub>S[M-H]<sup>-</sup>: 170.21; found: 170.0280.

### 3. Table S1

*pK*<sub>a</sub> of substituted BSA molecules

| Entry | Molecule        | <i>pK</i> <sub>a</sub> / H <sub>2</sub> O / 20 °C |
|-------|-----------------|---------------------------------------------------|
| 1     | <i>p</i> -MBSA  | 10.21                                             |
| 2     | <i>p</i> -MOBSA | 10.28                                             |
| 3     | <i>o</i> -NBSA  | 9.24 <sup>a</sup>                                 |
| 4     | <i>p</i> -CBSA  | 9.79                                              |
| 5     | BSA             | 10.07                                             |
| 6     | <i>p</i> -ABSAs | 10.51                                             |

<sup>a</sup> Data from ACS Scifinder, calculated using Advanced Chemistry Development (ACD/Labs) Software (© 1994-2026 ACD/Labs).

### 4. NMR spectroscopy for BSA-ILs

Figure S1A <sup>1</sup>H NMR for [P<sub>6 6 6 14</sub>][*p*-MBSA].



Figure S2A  $^1\text{H}$  NMR for  $[\text{P}_{4444}][\text{BSA}]$ .

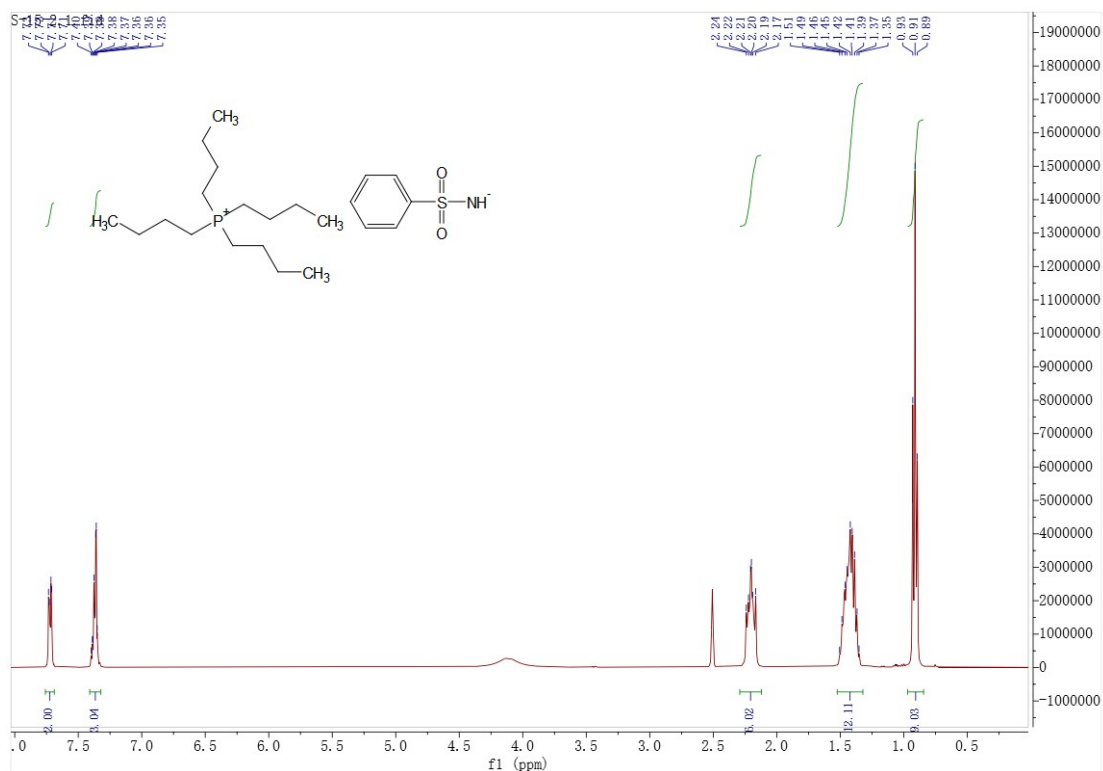

Figure S2B  $^{13}\text{C}$  NMR for  $[\text{P}_{4444}][\text{BSA}]$ .

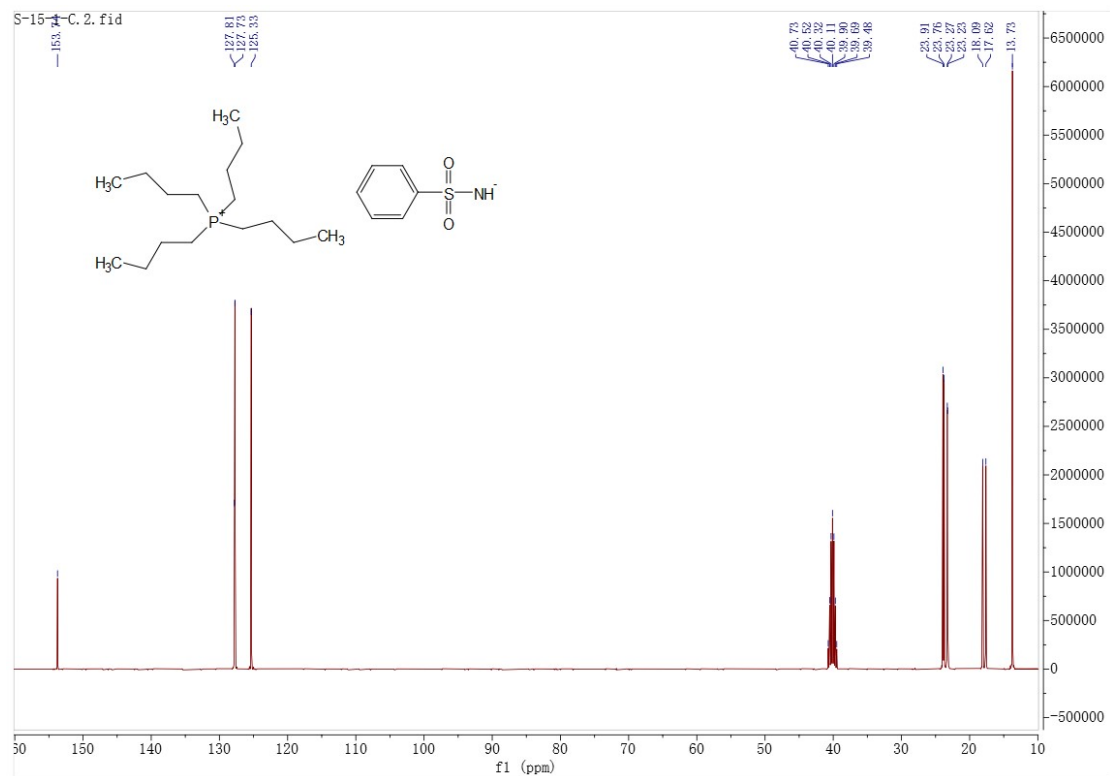



Figure S4A  $^1\text{H}$  NMR for  $[\text{P}_{4444}][p\text{-ABSA}]$ .

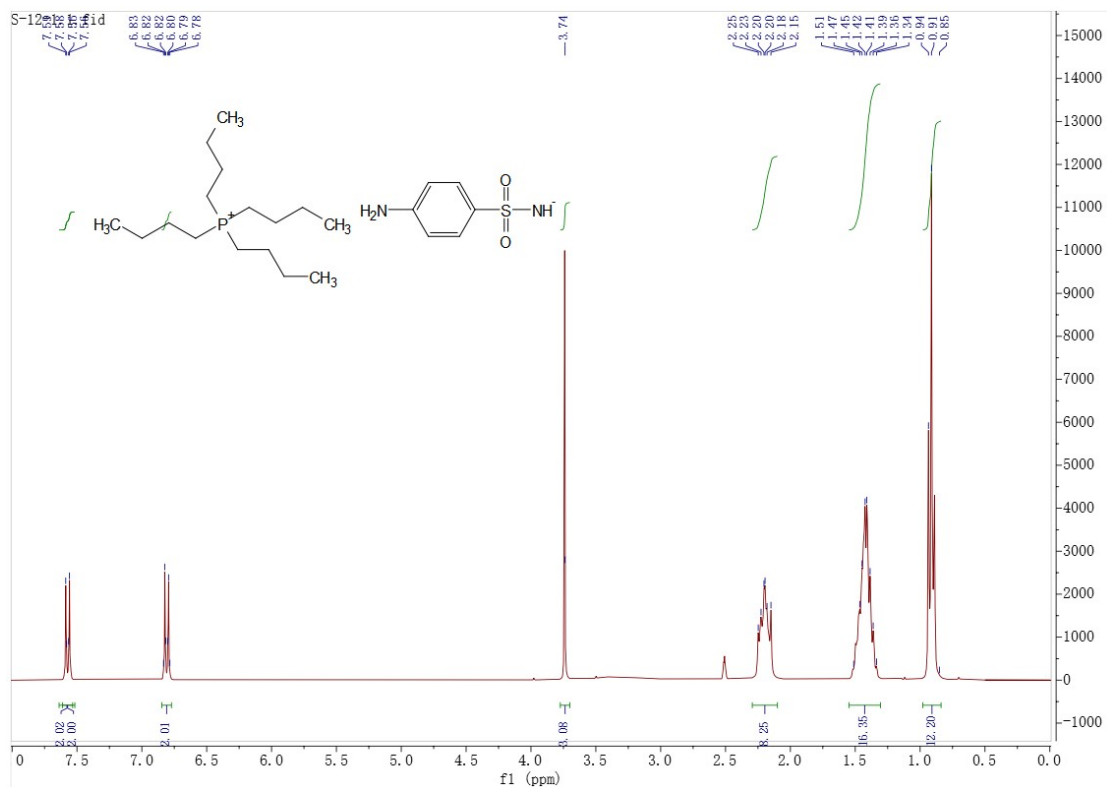

Figure S4B  $^{13}\text{C}$  NMR for  $[\text{P}_{4444}][p\text{-ABSA}]$ .

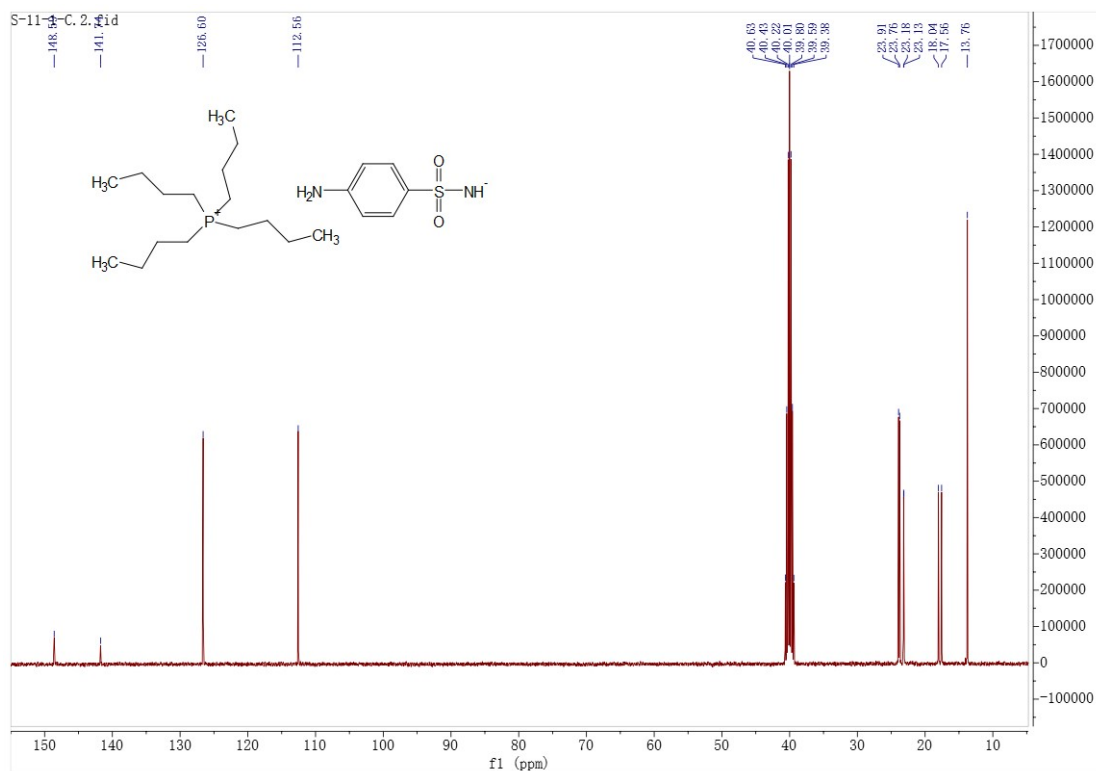

Figure S5A  $^1\text{H}$  NMR for  $[\text{P}_{4444}][p\text{-MBSA}]$ .

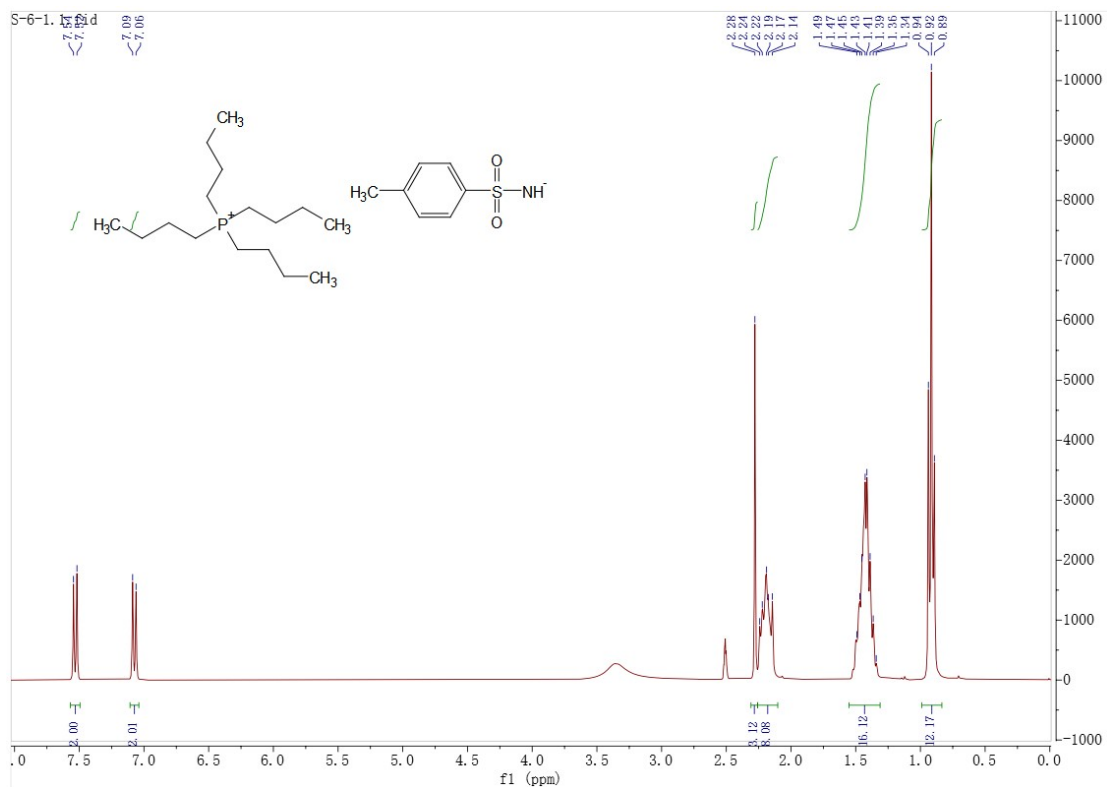

Figure S5B  $^{13}\text{C}$  NMR for  $[\text{P}_{4444}][p\text{-MBSA}]$ .

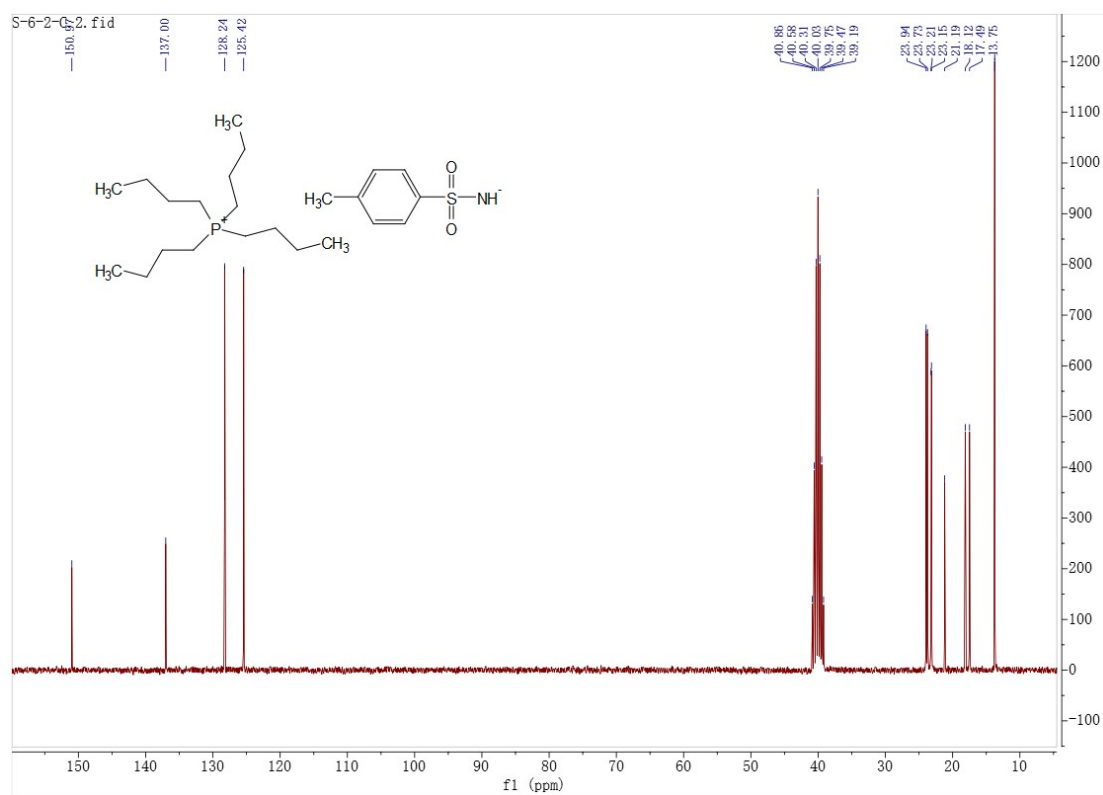

Figure S6A  $^1\text{H}$  NMR for  $[\text{P}_{4444}][p\text{-CBSA}]$ .

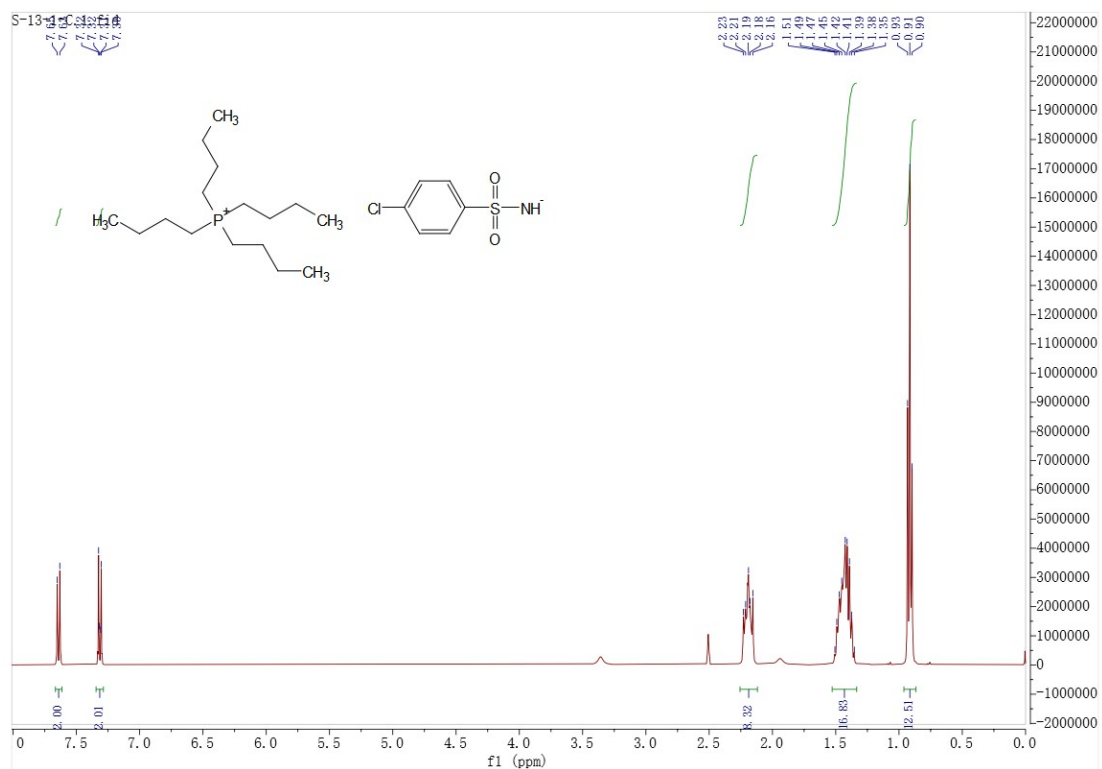

Figure S6B  $^{13}\text{C}$  NMR for  $[\text{P}_{4444}][p\text{-CBSA}]$ .

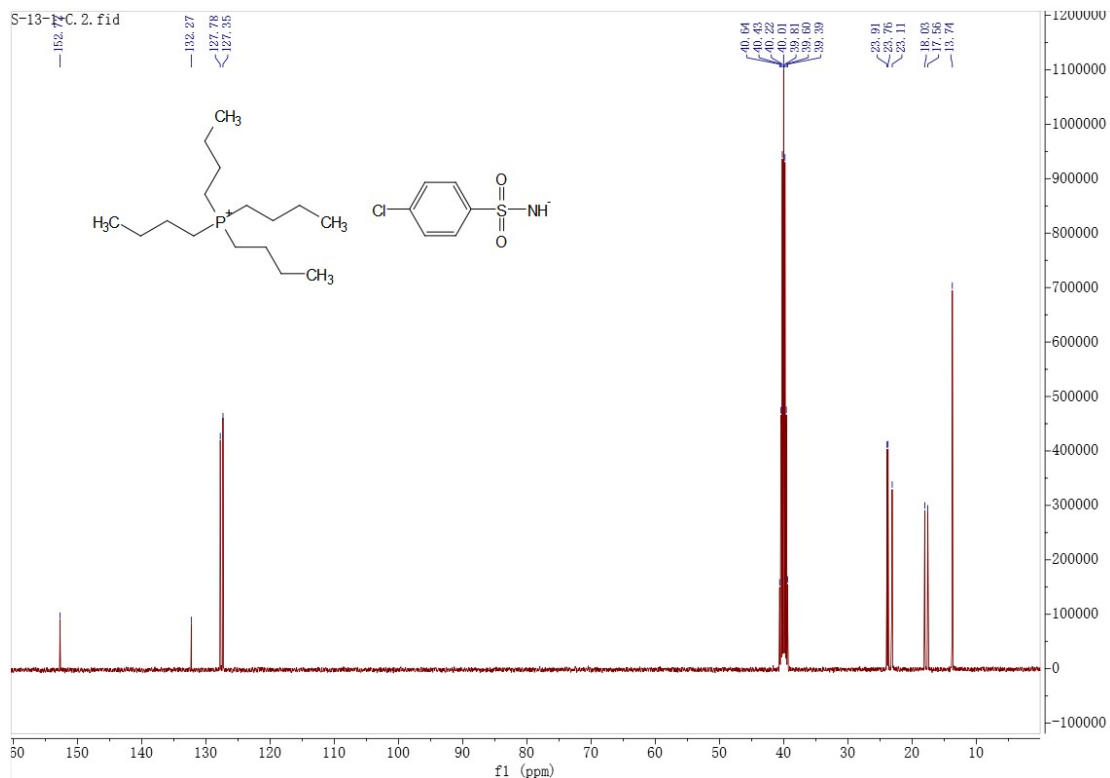



Figure S8A <sup>1</sup>H NMR for [P<sub>4</sub>444][*o*-NBSA].

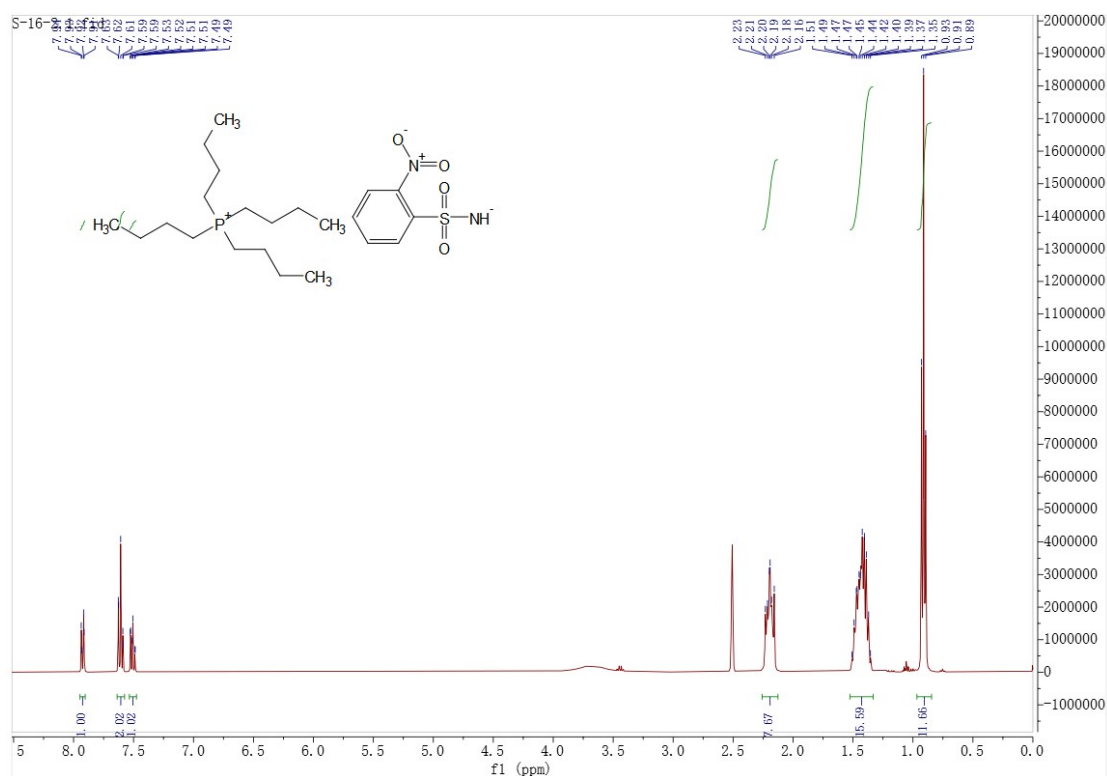

Figure S8B <sup>13</sup>C NMR for [P<sub>4</sub>444][*o*-NBSA].

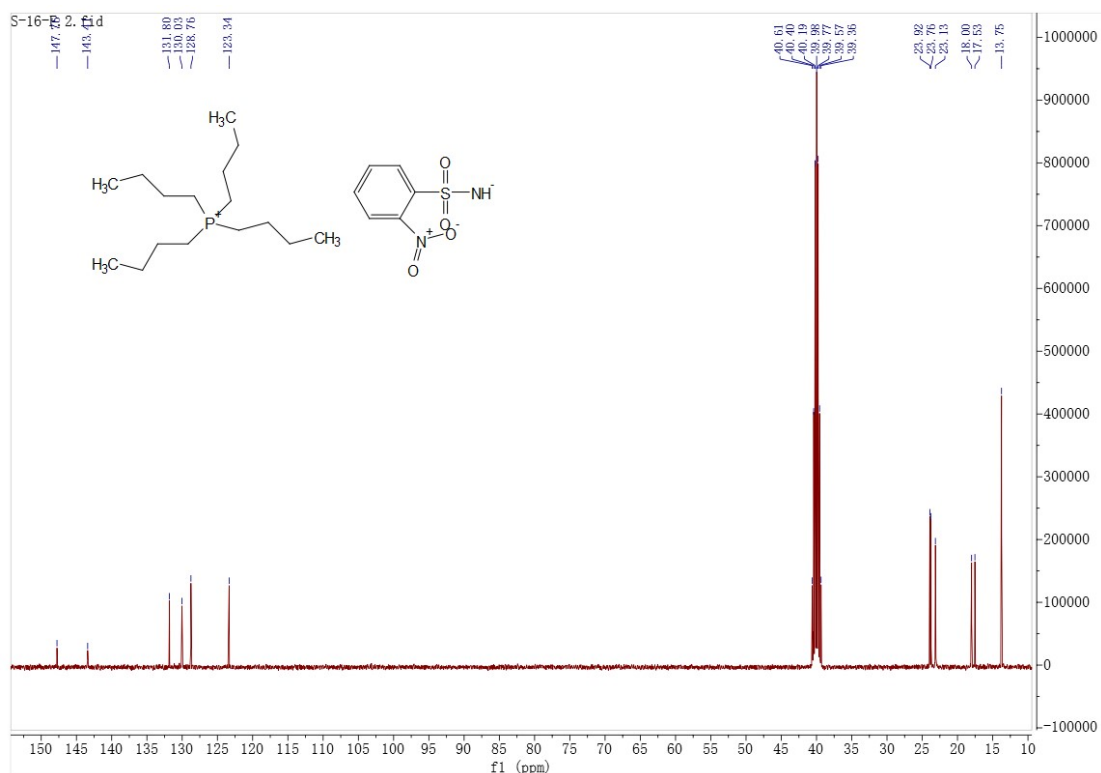

Figure S9A  $^1\text{H}$  NMR for  $[\text{N}_{111}\text{OH}_2]_2[\text{p-MBSA}]$ .

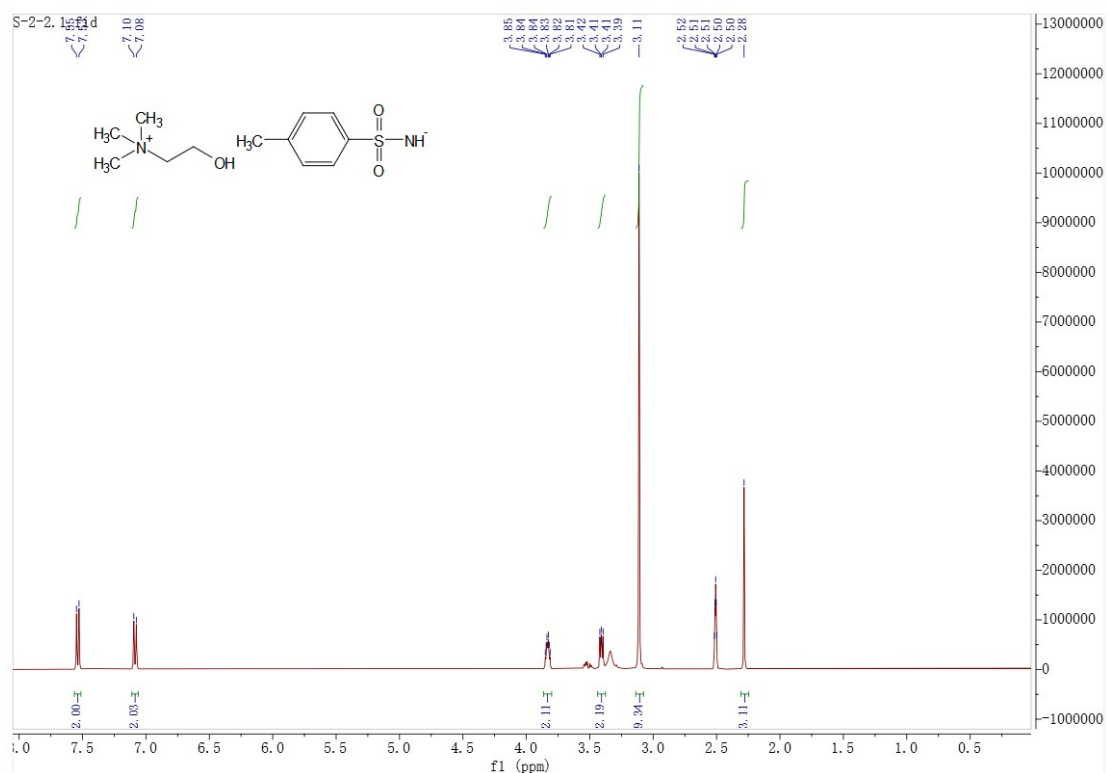

Figure S9B  $^{13}\text{C}$  NMR for  $[\text{N}_{111}\text{OH}_2]_2[\text{p-MBSA}]$ .

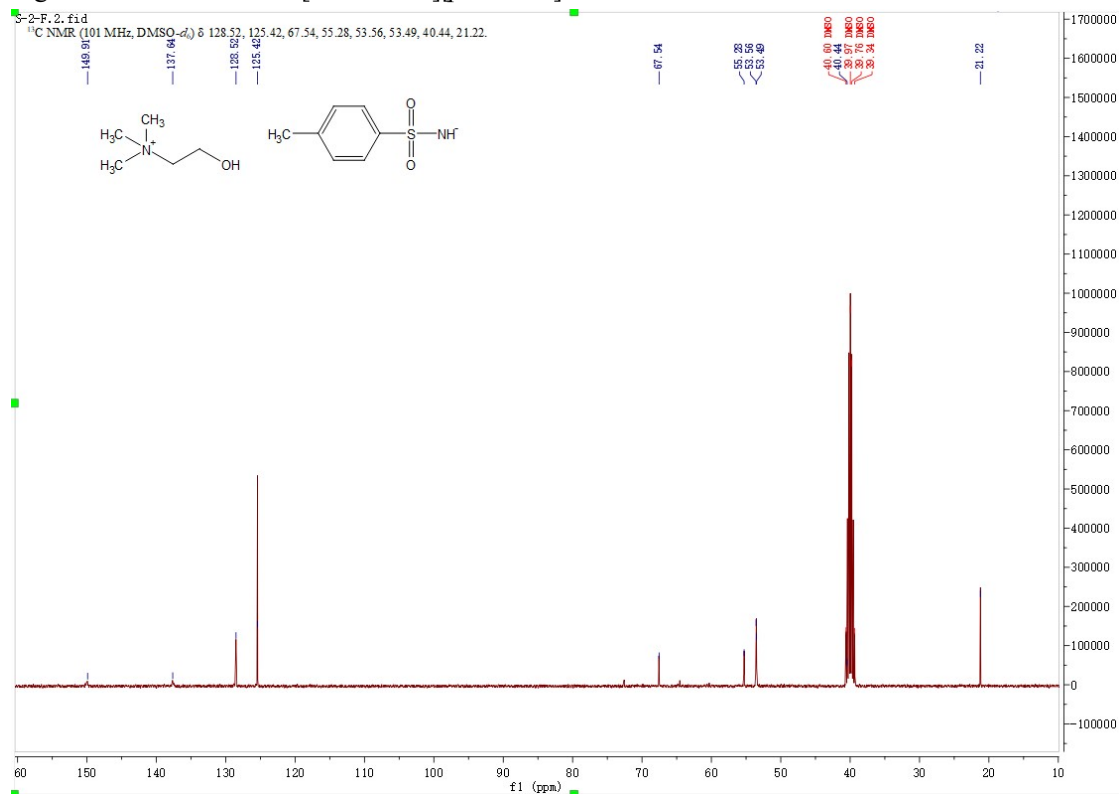

## 5. ESI-MS spectroscopy for BSA-ILs

Figure S10A: Anion MS for [P<sub>66614</sub>][p-MBSA].

|             |           |                        |         |                 |                                 |
|-------------|-----------|------------------------|---------|-----------------|---------------------------------|
| Sample Name | S-1       | Position               | Vial 4  | Instrument Name | Instrument 1                    |
| User Name   |           | Inj Vol                | 10      | InjPosition     |                                 |
| Sample Type | Sample    | IRM Calibration Status | Success | Data Filename   | S-1(N).d                        |
| ACQ Method  | E_-1211.m | Comment                |         | Acquired Time   | 3/4/2025 4:06:53 PM (UTC+08:00) |

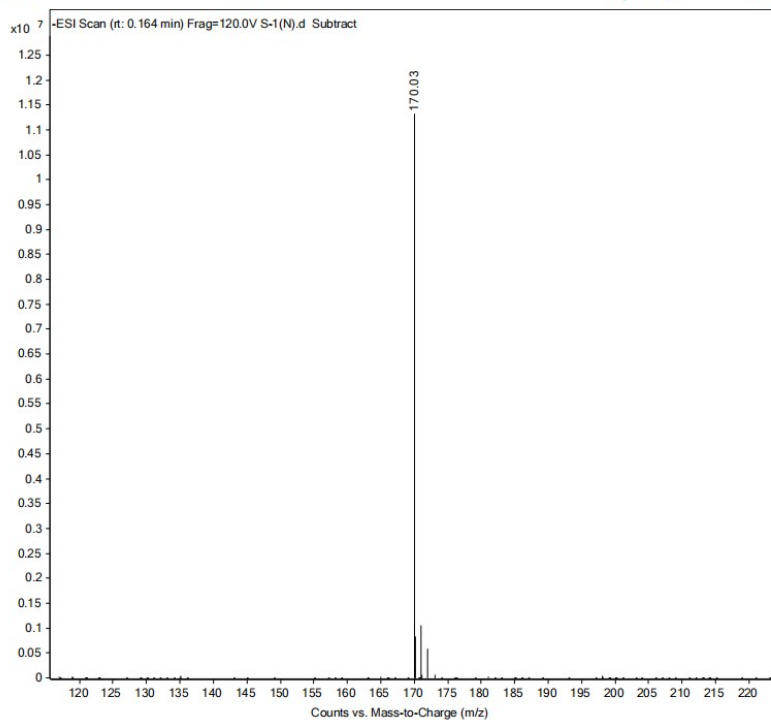

Figure S10B: Cation MS for [P<sub>66614</sub>][p-MBSA].

|             |           |                        |         |                 |                                 |
|-------------|-----------|------------------------|---------|-----------------|---------------------------------|
| Sample Name | S-1       | Position               | Vial 4  | Instrument Name | Instrument 1                    |
| User Name   |           | Inj Vol                | 10      | InjPosition     |                                 |
| Sample Type | Sample    | IRM Calibration Status | Success | Data Filename   | S-1(P).d                        |
| ACQ Method  | E+_1211.m | Comment                |         | Acquired Time   | 3/4/2025 3:56:15 PM (UTC+08:00) |

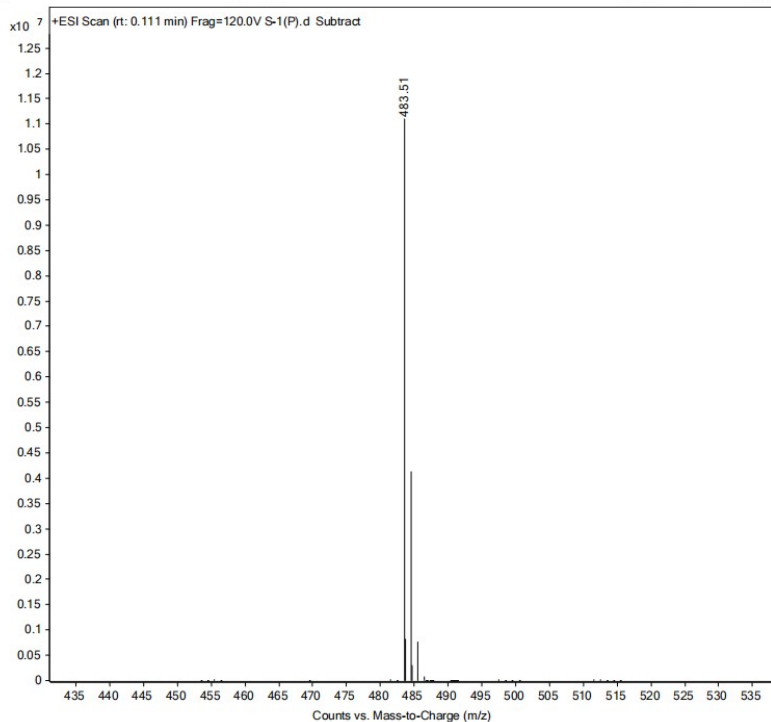

Figure S11A: Anion MS for [P<sub>4444</sub>][p-MBSA].

## Qualitative Analysis Report

|                               |              |                      |                                   |
|-------------------------------|--------------|----------------------|-----------------------------------|
| <b>Data Filename</b>          | S-6-.d       | <b>Sample Name</b>   | S-6                               |
| <b>Sample Type</b>            | Sample       | <b>Position</b>      | Vial 72                           |
| <b>Instrument Name</b>        | Instrument 1 | <b>User Name</b>     |                                   |
| <b>Acq Method</b>             | E-.m         | <b>Acquired Time</b> | 7/22/2024 11:03:21 AM (UTC+08:00) |
| <b>IRM Calibration Status</b> | Success      | <b>DA Method</b>     | 1.m                               |
| <b>Comment</b>                |              |                      |                                   |

|                               |                                               |                                 |                                   |
|-------------------------------|-----------------------------------------------|---------------------------------|-----------------------------------|
| <b>Sample Group</b>           |                                               | <b>Info.</b>                    |                                   |
| <b>Stream Name</b>            | LC 1                                          | <b>Acquisition Time (Local)</b> | 7/22/2024 11:03:21 AM (UTC+08:00) |
| <b>Acquisition SW Version</b> | 6200 series TOF/6500 series Q-TOF 10.1 (48.0) | <b>TOF Driver Version</b>       | 10.01.00                          |
| <b>TOF Firmware Version</b>   | 17.811                                        | <b>Tune Mass Range Max.</b>     | 3200                              |

### Spectra

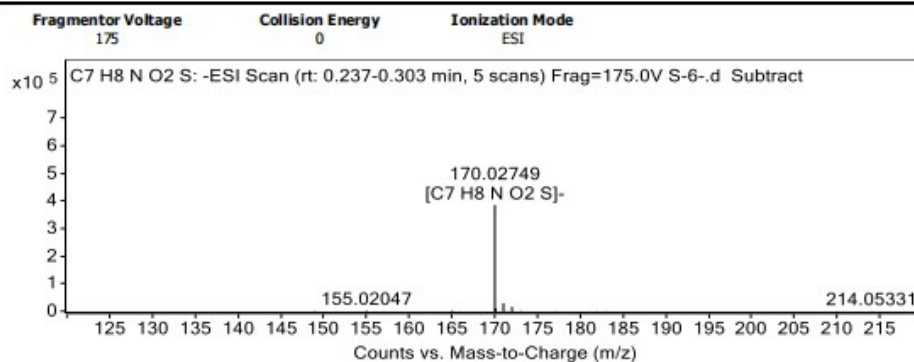

#### Peak List

| m/z       | z | Abund     | Formula      | Ion |
|-----------|---|-----------|--------------|-----|
| 170.02749 | 1 | 384989.91 | C7 H8 N O2 S | M-  |
| 379.25858 | 1 | 43021.89  |              |     |
| 409.26895 | 1 | 70463.7   |              |     |
| 504.28676 | 1 | 51352.33  |              |     |
| 599.30479 | 1 | 43223.52  |              |     |

#### Formula Calculator Element Limits

| Element | Min | Max |
|---------|-----|-----|
| C       | 5   | 9   |
| H       | 6   | 10  |
| O       | 1   | 3   |
| N       | 0   | 2   |
| S       | 0   | 1   |

#### Formula Calculator Results

| Formula      | Best | Mass      | Tgt Mass  | Diff (ppm) | Ion Species  | Calculated Mz |
|--------------|------|-----------|-----------|------------|--------------|---------------|
| C7 H8 N O2 S | TRUE | 170.02697 | 170.02757 | 3.54       | C7 H8 N O2 S | 170.02812     |

--- End Of Report ---

Figure S11B: Cation MS for [P<sub>4444</sub>][p-MBSA].

## Qualitative Analysis Report

|                               |              |                      |                                   |
|-------------------------------|--------------|----------------------|-----------------------------------|
| <b>Data Filename</b>          | S-6.d        | <b>Sample Name</b>   | S-6                               |
| <b>Sample Type</b>            | Sample       | <b>Position</b>      | Vial 72                           |
| <b>Instrument Name</b>        | Instrument 1 | <b>User Name</b>     |                                   |
| <b>Acq Method</b>             | E+.m         | <b>Acquired Time</b> | 7/22/2024 11:00:33 AM (UTC+08:00) |
| <b>IRM Calibration Status</b> | Success      | <b>DA Method</b>     | 1.m                               |
| <b>Comment</b>                |              |                      |                                   |

|                               |                                               |                                 |                                   |
|-------------------------------|-----------------------------------------------|---------------------------------|-----------------------------------|
| <b>Sample Group</b>           |                                               | <b>Info.</b>                    |                                   |
| <b>Stream Name</b>            | LC 1                                          | <b>Acquisition Time (Local)</b> | 7/22/2024 11:00:33 AM (UTC+08:00) |
| <b>Acquisition SW Version</b> | 6200 series TOF/6500 series Q-TOF 10.1 (48.0) | <b>TOF Driver Version</b>       | 10.01.00                          |
| <b>TOF Firmware Version</b>   | 17.811                                        | <b>Tune Mass Range Max.</b>     | 3200                              |

### Spectra

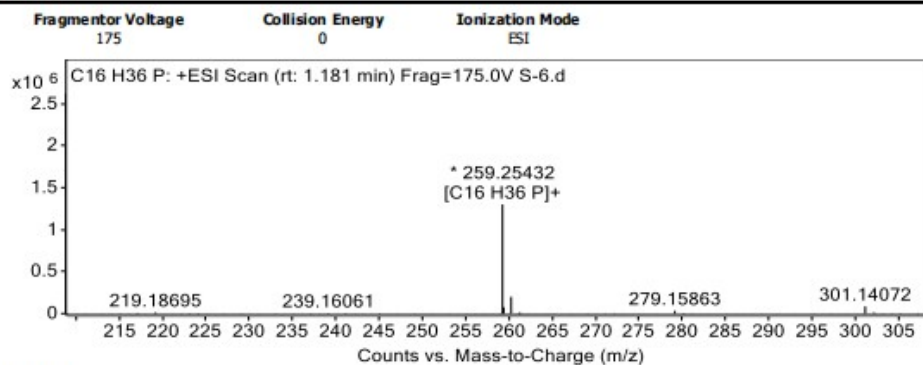

#### Peak List

| m/z       | z | Abund      | Formula   | Ion |
|-----------|---|------------|-----------|-----|
| 149.02332 | 1 | 39689.12   |           |     |
| 259.25432 | 1 | 1301121.63 | C16 H36 P | M+  |
| 259.40749 | 2 | 74689.47   |           |     |
| 260.25798 | 1 | 200382.91  | C16 H36 P | M+  |
| 301.14072 | 1 | 85832.21   |           |     |

#### Formula Calculator Element Limits

| Element | Min | Max |
|---------|-----|-----|
| C       | 6   | 26  |
| H       | 26  | 46  |
| P       | 1   | 1   |

#### Formula Calculator Results

| Formula   | Best | Mass     | Tgt Mass  | Diff (ppm) | Ion Species | CalculatedMz |
|-----------|------|----------|-----------|------------|-------------|--------------|
| C16 H36 P | TRUE | 259.2549 | 259.25546 | 2.16       | C16 H36 P   | 259.25491    |

--- End Of Report ---

Figure S12A: Cation MS for [P<sub>4444</sub>][p-MOBSA].

## Qualitative Analysis Report

|                        |              |               |                                  |
|------------------------|--------------|---------------|----------------------------------|
| Data Filename          | S-12.d       | Sample Name   | S-12                             |
| Sample Type            | Sample       | Position      | Vial 74                          |
| Instrument Name        | Instrument 1 | User Name     |                                  |
| Acq Method             | E+.m         | Acquired Time | 7/21/2024 3:55:20 PM (UTC+08:00) |
| IRM Calibration Status | Success      | DA Method     | 1.m                              |
| Comment                |              |               |                                  |

|                        |                                               |                          |                                  |
|------------------------|-----------------------------------------------|--------------------------|----------------------------------|
| Sample Group           |                                               | Info.                    |                                  |
| Stream Name            | LC 1                                          | Acquisition Time (Local) | 7/21/2024 3:55:20 PM (UTC+08:00) |
| Acquisition SW Version | 6200 series TOF/6500 series Q-TOF 10.1 (48.0) | TOF Driver Version       | 10.01.00                         |
| TOF Firmware Version   | 17.811                                        | Tune Mass Range Max.     | 3200                             |

### Spectra

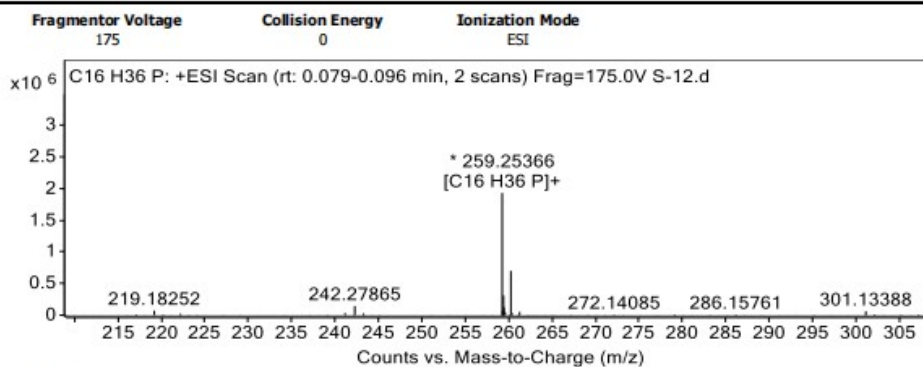

#### Peak List

| m/z       | z | Abund      | Formula   | Ion |
|-----------|---|------------|-----------|-----|
| 242.27865 | 1 | 144102.09  |           |     |
| 259.25366 |   | 1929231.75 | C16 H36 P | M+  |
| 259.40194 | 1 | 311552.91  |           |     |
| 259.44196 | 2 | 126089.5   |           |     |
| 260.2522  | 1 | 699542     |           |     |

#### Formula Calculator Element Limits

| Element | Min | Max |
|---------|-----|-----|
| C       | 6   | 26  |
| H       | 26  | 46  |
| P       | 1   | 1   |

#### Formula Calculator Results

| Formula   | Best | Mass      | Tgt Mass  | Diff (ppm) | Ion Species | CalculatedMz |
|-----------|------|-----------|-----------|------------|-------------|--------------|
| C16 H36 P | TRUE | 259.25421 | 259.25546 | 4.83       | C16 H36 P   | 259.25491    |

--- End Of Report ---

Figure S12B: Anion MS for [P<sub>4444</sub>][p-MOBSA].

## Qualitative Analysis Report

|                        |              |               |                                  |
|------------------------|--------------|---------------|----------------------------------|
| Data Filename          | S-12-.d      | Sample Name   | S-12                             |
| Sample Type            | Sample       | Position      | Vial 74                          |
| Instrument Name        | Instrument 1 | User Name     |                                  |
| Acq Method             | E-.m         | Acquired Time | 7/21/2024 5:45:49 PM (UTC+08:00) |
| IRM Calibration Status | Success      | DA Method     | 1.m                              |
| Comment                |              |               |                                  |

|                        |                                               |                          |                                  |
|------------------------|-----------------------------------------------|--------------------------|----------------------------------|
| Sample Group           |                                               | Info.                    |                                  |
| Stream Name            | LC 1                                          | Acquisition Time (Local) | 7/21/2024 5:45:49 PM (UTC+08:00) |
| Acquisition SW Version | 6200 series TOF/6500 series Q-TOF 10.1 (48.0) | TOF Driver Version       | 10.01.00                         |
| TOF Firmware Version   | 17.811                                        | Tune Mass Range Max.     | 3200                             |

### Spectra

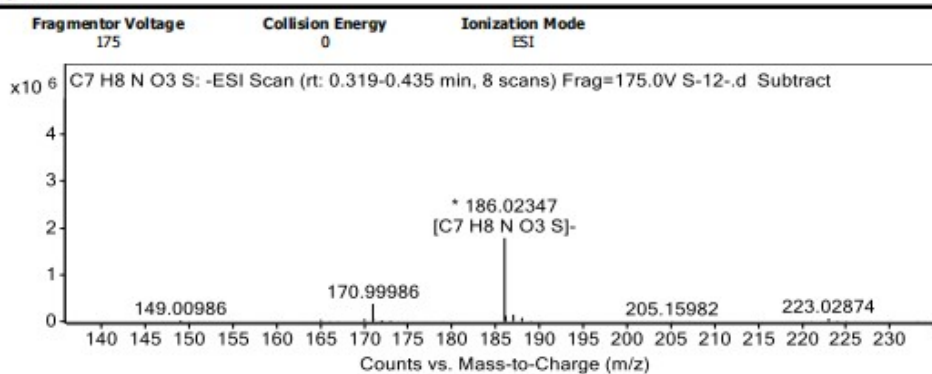

### Peak List

| m/z       | z | Abund      | Formula      | Ion |
|-----------|---|------------|--------------|-----|
| 107.03745 | 1 | 272316.06  |              |     |
| 170.99986 | 1 | 376046.59  |              |     |
| 186.02347 | 1 | 1785103.38 | C7 H8 N O3 S | M-  |
| 187.02633 | 1 | 144745.45  | C7 H8 N O3 S | M-  |
| 631.29989 | 1 | 129946.1   |              |     |

### Formula Calculator Element Limits

| Element | Min | Max |
|---------|-----|-----|
| C       | 5   | 9   |
| H       | 6   | 10  |
| N       | 0   | 2   |
| O       | 2   | 4   |
| S       | 1   | 1   |

### Formula Calculator Results

| Formula      | Best | Mass      | Tgt Mass  | Diff (ppm) | Ion Species  | Calculated Mz |
|--------------|------|-----------|-----------|------------|--------------|---------------|
| C7 H8 N O3 S | TRUE | 186.02292 | 186.02249 | -2.32      | C7 H8 N O3 S | 186.02304     |

--- End Of Report ---

Figure S13A: Anion MS for [P<sub>4</sub> 4 4 4][BSA].

|             |           |                        |         |                 |                                 |
|-------------|-----------|------------------------|---------|-----------------|---------------------------------|
| Sample Name | S-15      | Position               | Vial 5  | Instrument Name | Instrument 1                    |
| User Name   |           | Inj Vol                | 10      | InjPosition     |                                 |
| Sample Type | Sample    | IRM Calibration Status | Success | Data Filename   | S-15(N).d                       |
| ACQ Method  | E_-1211.m | Comment                |         | Acquired Time   | 3/4/2025 4:09:35 PM (UTC+08:00) |

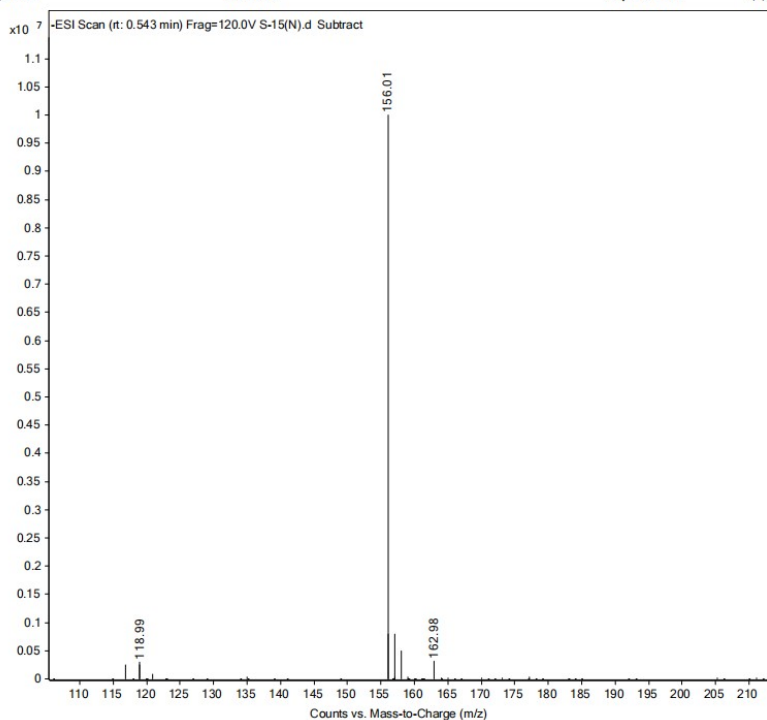

Figure S13B: Cation MS for [P<sub>4</sub> 4 4 4][BSA].

|             |           |                        |         |                 |                                 |
|-------------|-----------|------------------------|---------|-----------------|---------------------------------|
| Sample Name | S-15      | Position               | Vial 5  | Instrument Name | Instrument 1                    |
| User Name   |           | Inj Vol                | 10      | InjPosition     |                                 |
| Sample Type | Sample    | IRM Calibration Status | Success | Data Filename   | S-15(P).d                       |
| ACQ Method  | E+_1211.m | Comment                |         | Acquired Time   | 3/4/2025 3:58:57 PM (UTC+08:00) |

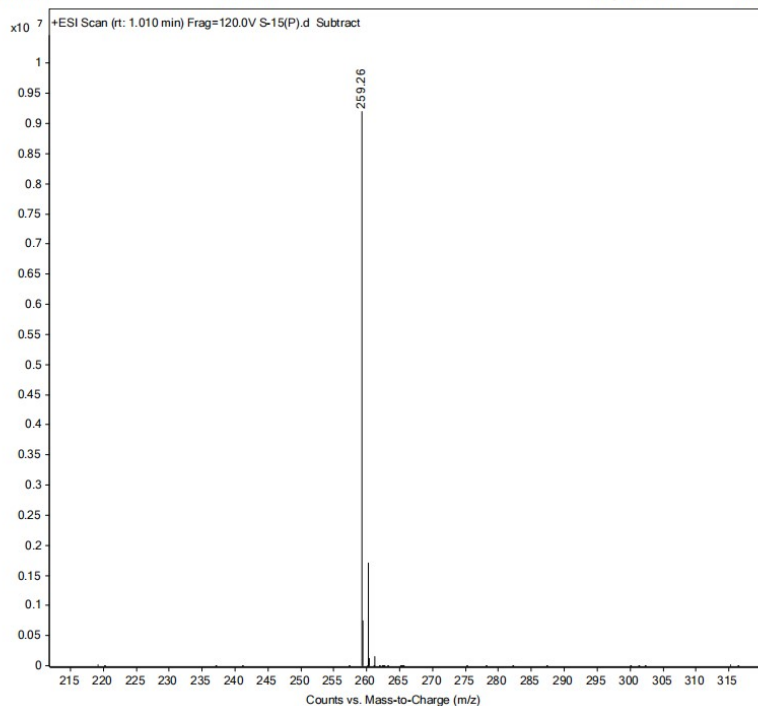

Figure S14A: Anion MS for [P<sub>4444</sub>][p-CBSA].

### Qualitative Analysis Report

|                               |                                               |                                 |                                  |
|-------------------------------|-----------------------------------------------|---------------------------------|----------------------------------|
| <b>Data Filename</b>          | S-13-.d                                       | <b>Sample Name</b>              | S-13                             |
| <b>Sample Type</b>            | Sample                                        | <b>Position</b>                 | Vial 75                          |
| <b>Instrument Name</b>        | Instrument 1                                  | <b>User Name</b>                |                                  |
| <b>Acq Method</b>             | E.m                                           | <b>Acquired Time</b>            | 7/21/2024 5:48:38 PM (UTC+08:00) |
| <b>IRM Calibration Status</b> | Success                                       | <b>DA Method</b>                | 1.m                              |
| <b>Comment</b>                |                                               |                                 |                                  |
| <b>Sample Group</b>           |                                               | <b>Info.</b>                    |                                  |
| <b>Stream Name</b>            | LC 1                                          | <b>Acquisition Time (Local)</b> | 7/21/2024 5:48:38 PM (UTC+08:00) |
| <b>Acquisition SW Version</b> | 6200 series TOF/6500 series Q-TOF 10.1 (48.0) | <b>TOF Driver Version</b>       | 10.01.00                         |
| <b>TOF Firmware Version</b>   | 17.811                                        | <b>Tune Mass Range Max.</b>     | 3200                             |

### Spectra

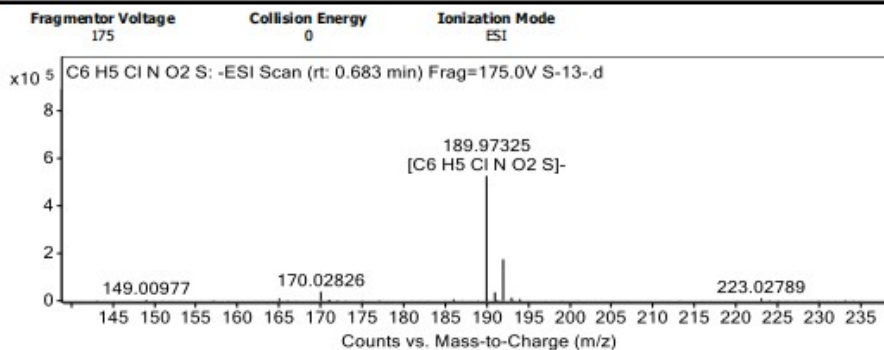

Figure S14B: Cation MS for [P<sub>4444</sub>][p-CBSA].

## Qualitative Analysis Report

|                               |                                               |                                 |                                  |
|-------------------------------|-----------------------------------------------|---------------------------------|----------------------------------|
| <b>Data Filename</b>          | S-13.d                                        | <b>Sample Name</b>              | S-13                             |
| <b>Sample Type</b>            | Sample                                        | <b>Position</b>                 | Vial 75                          |
| <b>Instrument Name</b>        | Instrument 1                                  | <b>User Name</b>                |                                  |
| <b>Acq Method</b>             | E+.m                                          | <b>Acquired Time</b>            | 7/21/2024 3:58:09 PM (UTC+08:00) |
| <b>IRM Calibration Status</b> | Success                                       | <b>DA Method</b>                | 1.m                              |
| <b>Comment</b>                |                                               |                                 |                                  |
| <b>Sample Group</b>           |                                               | <b>Info.</b>                    |                                  |
| <b>Stream Name</b>            | LC 1                                          | <b>Acquisition Time (Local)</b> | 7/21/2024 3:58:09 PM (UTC+08:00) |
| <b>Acquisition SW Version</b> | 6200 series TOF/6500 series Q-TOF 10.1 (48.0) | <b>TOF Driver Version</b>       | 10.01.00                         |
| <b>TOF Firmware Version</b>   | 17.811                                        | <b>Tune Mass Range Max.</b>     | 3200                             |

### Spectra

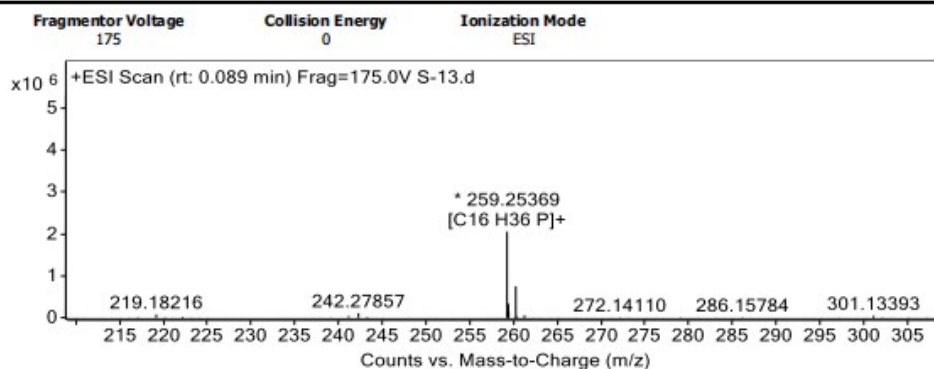

Figure S15A: Anion MS for [P<sub>4444</sub>][p-ABSA].

### Qualitative Analysis Report

|                               |                                               |                                 |                                   |
|-------------------------------|-----------------------------------------------|---------------------------------|-----------------------------------|
| <b>Data Filename</b>          | S-11-.d                                       | <b>Sample Name</b>              | S-11                              |
| <b>Sample Type</b>            | Sample                                        | <b>Position</b>                 | Vial 73                           |
| <b>Instrument Name</b>        | Instrument 1                                  | <b>User Name</b>                |                                   |
| <b>Acq Method</b>             | E-.m                                          | <b>Acquired Time</b>            | 7/22/2024 11:21:45 AM (UTC+08:00) |
| <b>IRM Calibration Status</b> | Success                                       | <b>DA Method</b>                | 1.m                               |
| <b>Comment</b>                |                                               |                                 |                                   |
| <b>Sample Group</b>           |                                               | <b>Info.</b>                    |                                   |
| <b>Stream Name</b>            | LC 1                                          | <b>Acquisition Time (Local)</b> | 7/22/2024 11:21:45 AM (UTC+08:00) |
| <b>Acquisition SW Version</b> | 6200 series TOF/6500 series Q-TOF 10.1 (48.0) | <b>TOF Driver Version</b>       | 10.01.00                          |
| <b>TOF Firmware Version</b>   | 17.811                                        | <b>Tune Mass Range Max.</b>     | 3200                              |

### Spectra

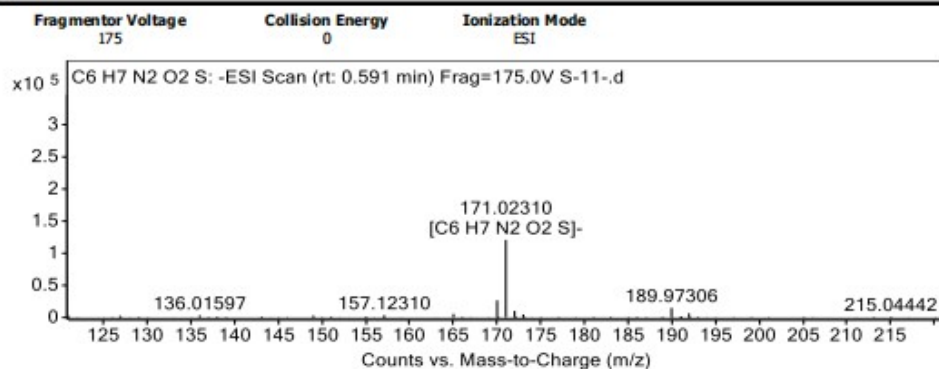

Figure S15B: Cation MS for [P<sub>4444</sub>][p-ABSA].

### Qualitative Analysis Report

|                               |                                               |                                 |                                   |
|-------------------------------|-----------------------------------------------|---------------------------------|-----------------------------------|
| <b>Data Filename</b>          | S-11.d                                        | <b>Sample Name</b>              | S-11                              |
| <b>Sample Type</b>            | Sample                                        | <b>Position</b>                 | Vial 73                           |
| <b>Instrument Name</b>        | Instrument 1                                  | <b>User Name</b>                |                                   |
| <b>Acq Method</b>             | E+.m                                          | <b>Acquired Time</b>            | 7/22/2024 11:33:00 AM (UTC+08:00) |
| <b>IRM Calibration Status</b> | Success                                       | <b>DA Method</b>                | 1.m                               |
| <b>Comment</b>                |                                               |                                 |                                   |
| <b>Sample Group</b>           |                                               | <b>Info.</b>                    |                                   |
| <b>Stream Name</b>            | LC 1                                          | <b>Acquisition Time (Local)</b> | 7/22/2024 11:33:00 AM (UTC+08:00) |
| <b>Acquisition SW Version</b> | 6200 series TOF/6500 series Q-TOF 10.1 (48.0) | <b>TOF Driver Version</b>       | 10.01.00                          |
| <b>TOF Firmware Version</b>   | 17.811                                        | <b>Tune Mass Range Max.</b>     | 3200                              |

### Spectra

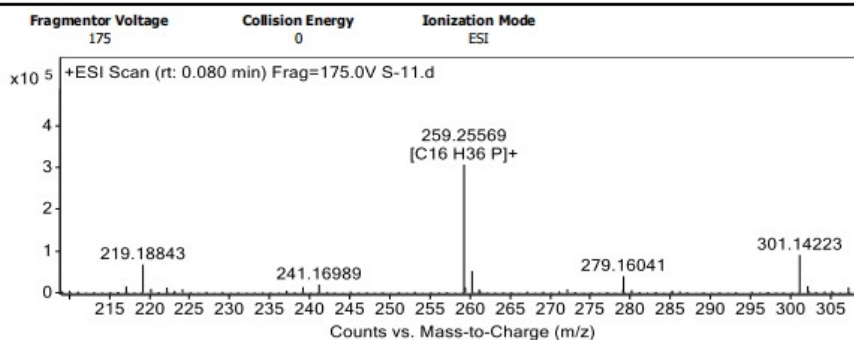

Figure S16A: Anion MS for [P<sub>4444</sub>][*o*-NBSA].

|                    |           |                               |         |                        |                                 |
|--------------------|-----------|-------------------------------|---------|------------------------|---------------------------------|
| <b>Sample Name</b> | S-16      | <b>Position</b>               | Vial 6  | <b>Instrument Name</b> | Instrument 1                    |
| <b>User Name</b>   |           | <b>Inj Vol</b>                | 10      | <b>InjPosition</b>     |                                 |
| <b>Sample Type</b> | Sample    | <b>IRM Calibration Status</b> | Success | <b>Data Filename</b>   | S-16(N).d                       |
| <b>ACQ Method</b>  | E-_1211.m | <b>Comment</b>                |         | <b>Acquired Time</b>   | 3/4/2025 4:12:18 PM (UTC+08:00) |

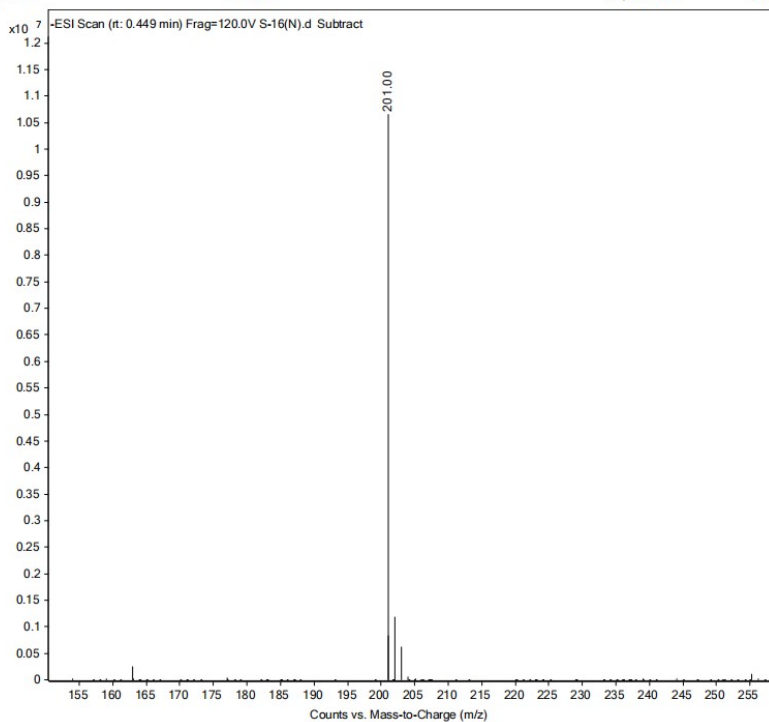

Figure S16B: Cation MS for [P<sub>4444</sub>][*o*-NBSA].

|                    |           |                               |         |                        |                                 |
|--------------------|-----------|-------------------------------|---------|------------------------|---------------------------------|
| <b>Sample Name</b> | S-16      | <b>Position</b>               | Vial 6  | <b>Instrument Name</b> | Instrument 1                    |
| <b>User Name</b>   |           | <b>Inj Vol</b>                | 10      | <b>InjPosition</b>     |                                 |
| <b>Sample Type</b> | Sample    | <b>IRM Calibration Status</b> | Success | <b>Data Filename</b>   | S-16(P).d                       |
| <b>ACQ Method</b>  | E+_1211.m | <b>Comment</b>                |         | <b>Acquired Time</b>   | 3/4/2025 4:01:43 PM (UTC+08:00) |

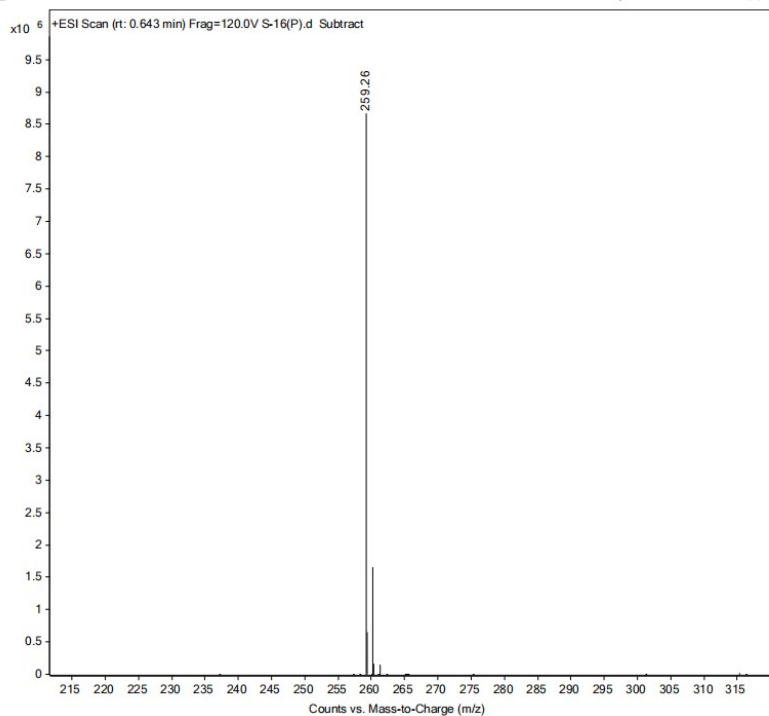

Figure S17A: Cation MS for [N<sub>4</sub> 4 4 4][p-MBSA].

## Qualitative Analysis Report

|                               |              |                      |                                  |
|-------------------------------|--------------|----------------------|----------------------------------|
| <b>Data Filename</b>          | S-5.d        | <b>Sample Name</b>   | S-5                              |
| <b>Sample Type</b>            | Sample       | <b>Position</b>      | Vial 71                          |
| <b>Instrument Name</b>        | Instrument 1 | <b>User Name</b>     |                                  |
| <b>Acq Method</b>             | E+.m         | <b>Acquired Time</b> | 7/21/2024 3:46:50 PM (UTC+08:00) |
| <b>IRM Calibration Status</b> | Success      | <b>DA Method</b>     | 1.m                              |
| <b>Comment</b>                |              |                      |                                  |

|                               |                                               |                                 |                                  |
|-------------------------------|-----------------------------------------------|---------------------------------|----------------------------------|
| <b>Sample Group</b>           |                                               | <b>Info.</b>                    |                                  |
| <b>Stream Name</b>            | LC 1                                          | <b>Acquisition Time (Local)</b> | 7/21/2024 3:46:50 PM (UTC+08:00) |
| <b>Acquisition SW Version</b> | 6200 series TOF/6500 series Q-TOF 10.1 (48.0) | <b>TOF Driver Version</b>       | 10.01.00                         |
| <b>TOF Firmware Version</b>   | 17.811                                        | <b>Tune Mass Range Max.</b>     | 3200                             |

### Spectra

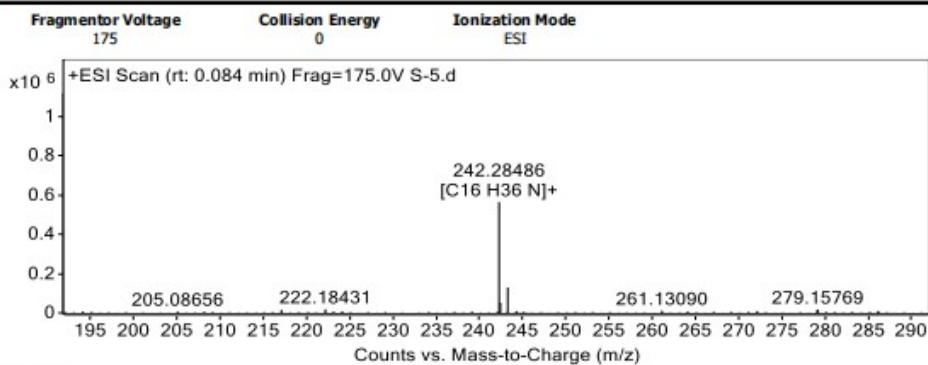

#### Peak List

| m/z       | z | Abund     | Formula   | Ion |
|-----------|---|-----------|-----------|-----|
| 130.1592  | 1 | 66542.29  |           |     |
| 242.28486 | 1 | 565513    | C16 H36 N | M+  |
| 242.43182 | 2 | 52084.15  |           |     |
| 243.28707 | 1 | 130511.56 | C16 H36 N | M+  |
| 301.14013 | 1 | 116144.56 |           |     |

#### Formula Calculator Element Limits

| Element | Min | Max |
|---------|-----|-----|
| C       | 6   | 26  |
| H       | 26  | 46  |
| N       | 0   | 2   |

#### Formula Calculator Results

| Formula   | Best | Mass      | Tgt Mass  | Diff (ppm) | Ion Species | Calculated Mz |
|-----------|------|-----------|-----------|------------|-------------|---------------|
| C16 H36 N | TRUE | 242.28521 | 242.28478 | -1.79      | C16 H36 N   | 242.28423     |

--- End Of Report ---

Figure S17B: Anion MS for [N<sub>4</sub>444][p-MBSA].

## Qualitative Analysis Report

|                               |                                               |                                 |                                  |
|-------------------------------|-----------------------------------------------|---------------------------------|----------------------------------|
| <b>Data Filename</b>          | S-5-.d                                        | <b>Sample Name</b>              | S-5                              |
| <b>Sample Type</b>            | Sample                                        | <b>Position</b>                 | Vial 71                          |
| <b>Instrument Name</b>        | Instrument 1                                  | <b>User Name</b>                |                                  |
| <b>Acq Method</b>             | E-.m                                          | <b>Acquired Time</b>            | 7/21/2024 5:37:18 PM (UTC+08:00) |
| <b>IRM Calibration Status</b> | Success                                       | <b>DA Method</b>                | 1.m                              |
| <b>Comment</b>                |                                               |                                 |                                  |
| <b>Sample Group</b>           |                                               | <b>Info.</b>                    |                                  |
| <b>Stream Name</b>            | LC 1                                          | <b>Acquisition Time (Local)</b> | 7/21/2024 5:37:18 PM (UTC+08:00) |
| <b>Acquisition SW Version</b> | 6200 series TOF/6500 series Q-TOF 10.1 (48.0) | <b>TOF Driver Version</b>       | 10.01.00                         |
| <b>TOF Firmware Version</b>   | 17.811                                        | <b>Tune Mass Range Max.</b>     | 3200                             |

### Spectra

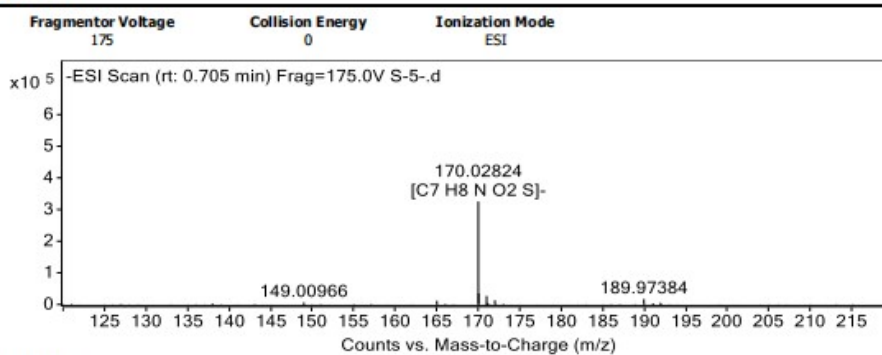

### Peak List

| m/z       | z | Abund     | Formula      | Ion |
|-----------|---|-----------|--------------|-----|
| 68.99625  |   | 64039.38  |              |     |
| 170.02824 | 1 | 326483.31 | C7 H8 N O2 S | M-  |
| 170.0685  |   | 35100.68  |              |     |
| 392.30121 | 1 | 98982.31  |              |     |
| 487.32067 | 1 | 82637.14  |              |     |

### Formula Calculator Element Limits

| Element | Min | Max |
|---------|-----|-----|
| C       | 5   | 9   |
| H       | 6   | 10  |
| N       | 0   | 2   |
| O       | 1   | 3   |
| S       | 1   | 1   |

### Formula Calculator Results

| Formula      | Best | Mass      | Tgt Mass  | Diff (ppm) | Ion Species  | CalculatedMz |
|--------------|------|-----------|-----------|------------|--------------|--------------|
| C7 H8 N O2 S | TRUE | 170.02774 | 170.02757 | -0.98      | C7 H8 N O2 S | 170.02812    |

--- End Of Report ---

Figure S18A: Cation MS for [N<sub>11</sub>C<sub>2</sub>OH] [*p*-MBSA].

### Qualitative Analysis Report

|                               |                                               |                                 |                                  |
|-------------------------------|-----------------------------------------------|---------------------------------|----------------------------------|
| <b>Data Filename</b>          | S-2.d                                         | <b>Sample Name</b>              | S-2                              |
| <b>Sample Type</b>            | Sample                                        | <b>Position</b>                 | Vial 69                          |
| <b>Instrument Name</b>        | Instrument 1                                  | <b>User Name</b>                |                                  |
| <b>Acq Method</b>             | E+.m                                          | <b>Acquired Time</b>            | 7/21/2024 3:41:12 PM (UTC+08:00) |
| <b>IRM Calibration Status</b> | Success                                       | <b>DA Method</b>                | 1.m                              |
| <b>Comment</b>                |                                               |                                 |                                  |
| <b>Sample Group</b>           |                                               | <b>Info.</b>                    |                                  |
| <b>Stream Name</b>            | LC 1                                          | <b>Acquisition Time (Local)</b> | 7/21/2024 3:41:12 PM (UTC+08:00) |
| <b>Acquisition SW Version</b> | 6200 series TOF/6500 series Q-TOF 10.1 (48.0) | <b>TOF Driver Version</b>       | 10.01.00                         |
| <b>TOF Firmware Version</b>   | 17.811                                        | <b>Tune Mass Range Max.</b>     | 3200                             |

### Spectra

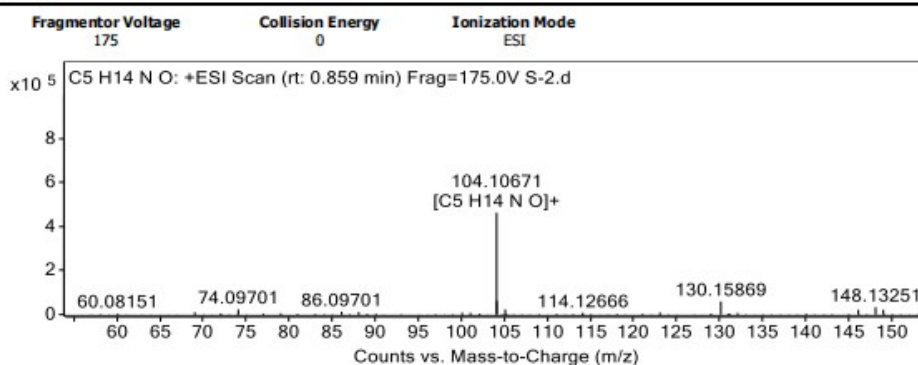

### Peak List

| m/z       | z | Abund     | Formula    | Ion |
|-----------|---|-----------|------------|-----|
| 104.10671 | 1 | 463126.78 | C5 H14 N O | M+  |
| 104.1286  |   | 62307.75  |            |     |
| 130.15869 | 1 | 59163.77  |            |     |
| 148.13251 | 1 | 32875.5   |            |     |
| 301.13887 | 1 | 99087.33  |            |     |

### Formula Calculator Element Limits

| Element | Min | Max |
|---------|-----|-----|
| C       | 2   | 8   |
| H       | 4   | 24  |
| N       | 0   | 2   |
| O       | 0   | 2   |

### Formula Calculator Results

| Formula    | Best | Mass      | Tgt Mass  | Diff (ppm) | Ion Species | Calculated Mz |
|------------|------|-----------|-----------|------------|-------------|---------------|
| C5 H14 N O | TRUE | 104.10727 | 104.10754 | 2.62       | C5 H14 N O  | 104.10699     |

--- End Of Report ---

Figure S18B: Anion MS for [N<sub>11</sub>C<sub>2</sub>OH] [*p*-MBSA].

## Qualitative Analysis Report

|                               |              |                      |                                  |
|-------------------------------|--------------|----------------------|----------------------------------|
| <b>Data Filename</b>          | S-2-.d       | <b>Sample Name</b>   | S-2                              |
| <b>Sample Type</b>            | Sample       | <b>Position</b>      | Vial 69                          |
| <b>Instrument Name</b>        | Instrument 1 | <b>User Name</b>     |                                  |
| <b>Acq Method</b>             | E-m          | <b>Acquired Time</b> | 7/21/2024 5:31:38 PM (UTC+08:00) |
| <b>IRM Calibration Status</b> | Success      | <b>DA Method</b>     | 1.m                              |
| <b>Comment</b>                |              |                      |                                  |

|                               |                                               |                                 |                                  |
|-------------------------------|-----------------------------------------------|---------------------------------|----------------------------------|
| <b>Sample Group</b>           |                                               | <b>Info.</b>                    |                                  |
| <b>Stream Name</b>            | LC 1                                          | <b>Acquisition Time (Local)</b> | 7/21/2024 5:31:38 PM (UTC+08:00) |
| <b>Acquisition SW Version</b> | 6200 series TOF/6500 series Q-TOF 10.1 (48.0) | <b>TOF Driver Version</b>       | 10.01.00                         |
| <b>TOF Firmware Version</b>   | 17.811                                        | <b>Tune Mass Range Max.</b>     | 3200                             |

### Spectra

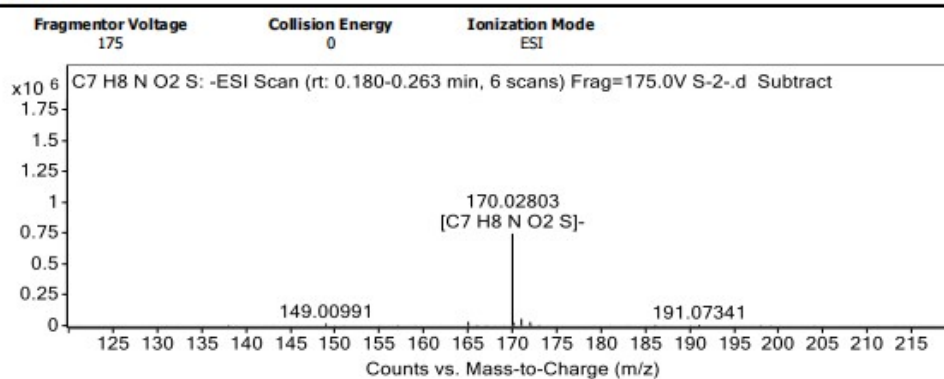

#### Peak List

| m/z       | z | Abund     | Formula      | Ion |
|-----------|---|-----------|--------------|-----|
| 170.02803 | 1 | 745039.25 | C7 H8 N O2 S | M-  |
| 171.03118 | 1 | 56029.41  | C7 H8 N O2 S | M-  |
| 223.02851 | 1 | 61838.25  |              |     |
| 255.23272 | 1 | 138577.88 |              |     |
| 283.26385 | 1 | 82473.28  |              |     |

#### Formula Calculator Element Limits

| Element | Min | Max |
|---------|-----|-----|
| C       | 5   | 9   |
| H       | 6   | 10  |
| N       | 0   | 2   |
| O       | 1   | 3   |
| S       | 1   | 1   |

#### Formula Calculator Results

| Formula      | Best | Mass      | Tgt Mass  | Diff (ppm) | Ion Species  | Calculated Mz |
|--------------|------|-----------|-----------|------------|--------------|---------------|
| C7 H8 N O2 S | TRUE | 170.02751 | 170.02757 | 0.36       | C7 H8 N O2 S | 170.02812     |

--- End Of Report ---

## 6. NMR spectroscopy for cyclic carbonates

Figure S19:  $^1\text{H}$  NMR spectra of 4-(chloromethyl)-1,3-dioxolan-2-one.

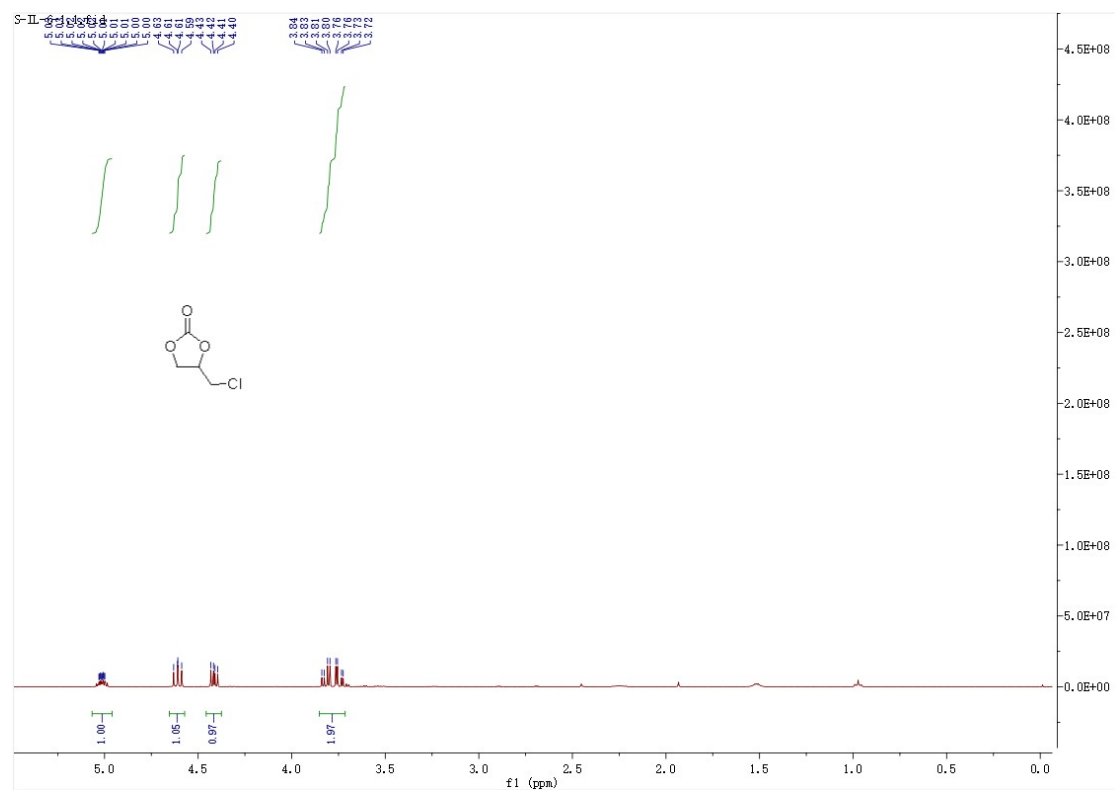

Figure S20:  $^1\text{H}$  NMR spectra of 4-(bromomethyl)-1,3-dioxolan-2-one.

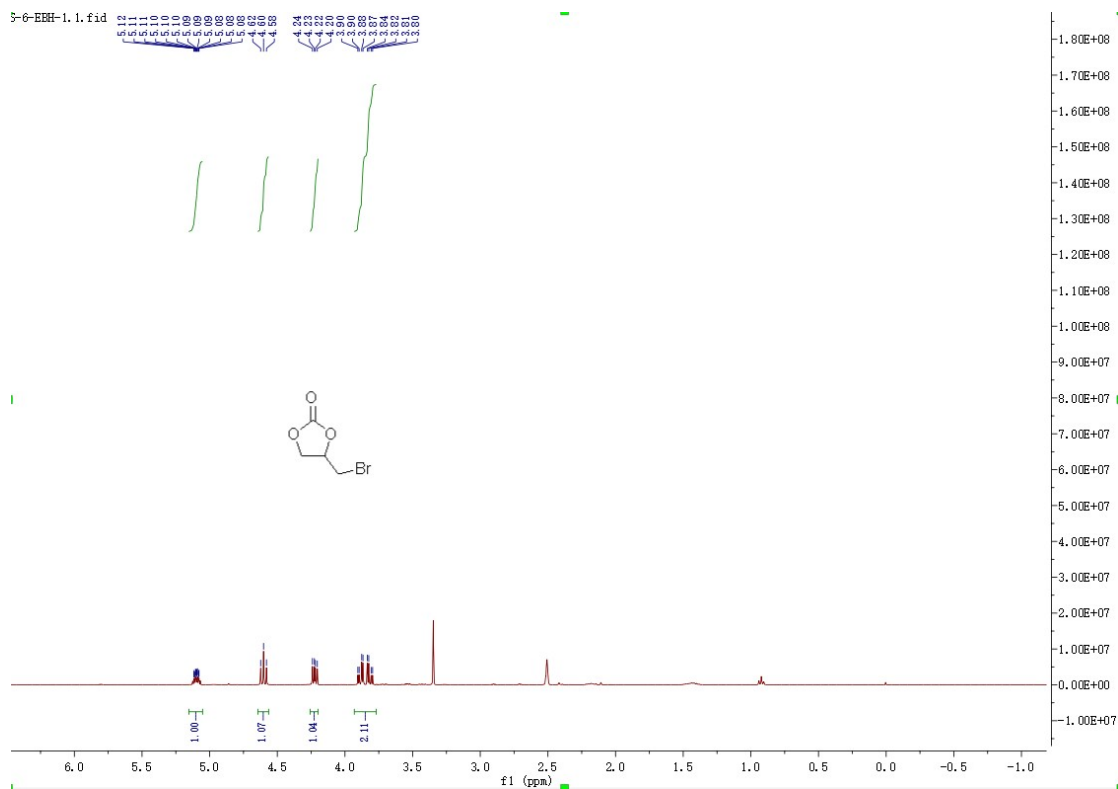



Figure S23:  $^1\text{H}$  NMR spectra of 4-(octyloxymethyl)-1,3-dioxolan-2-one.

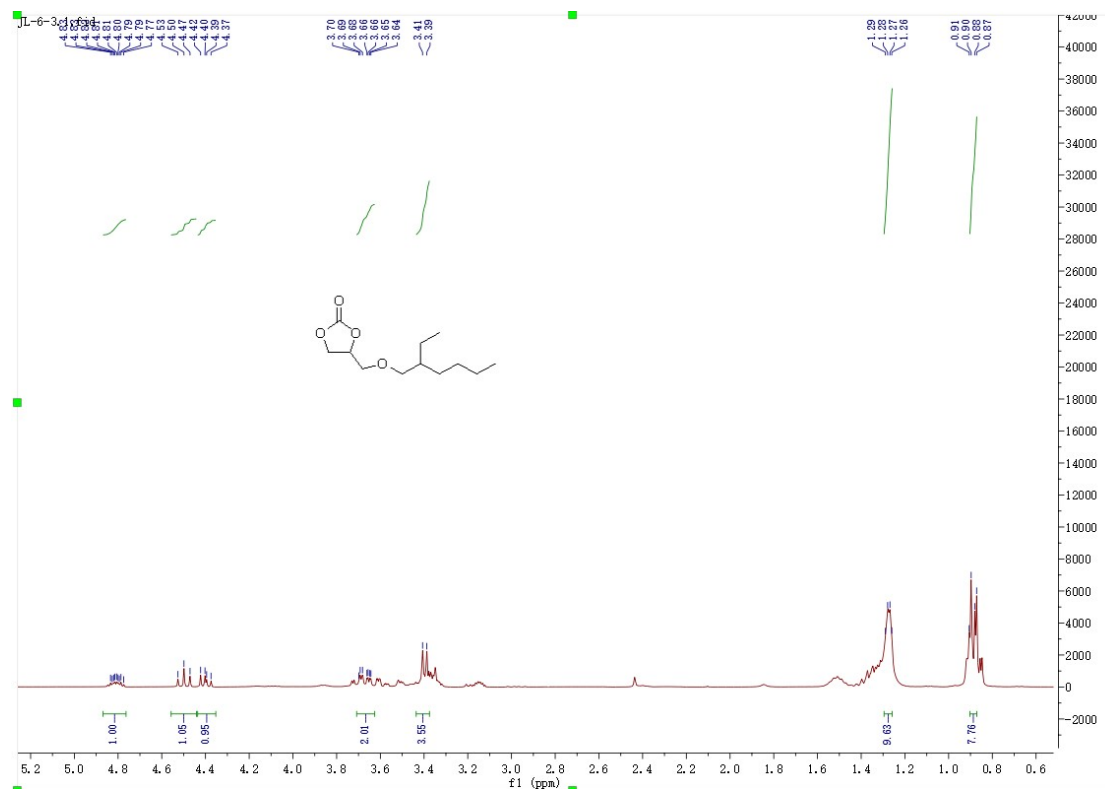

## 7. DSC of BSA-ILs

Figure S24

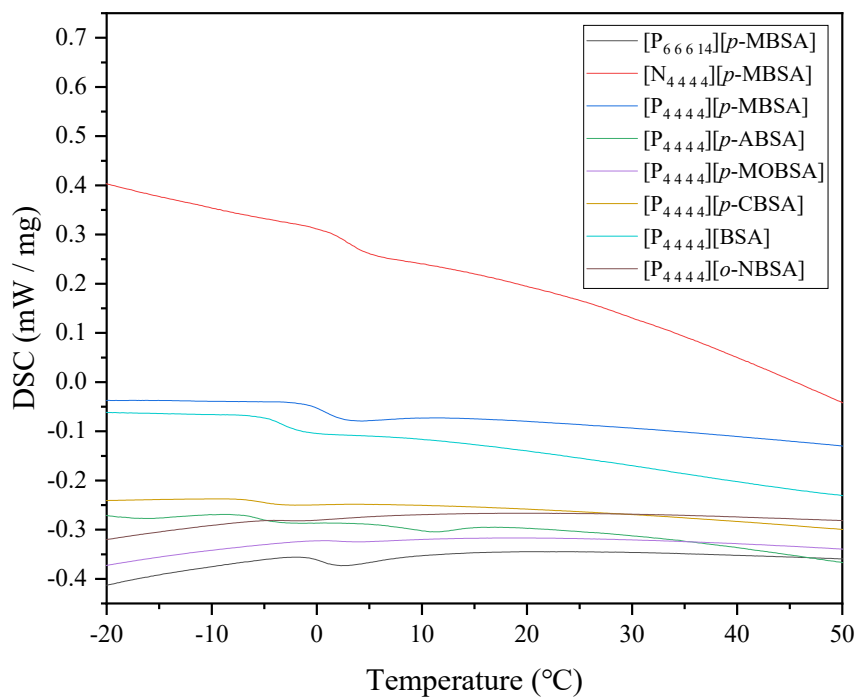

### 8. Viscosities of the CO<sub>2</sub>@[P<sub>4444</sub>][p-MOBSA]

Figure S25 Viscosities of the CO<sub>2</sub>@[P<sub>4444</sub>][p-MOBSA]

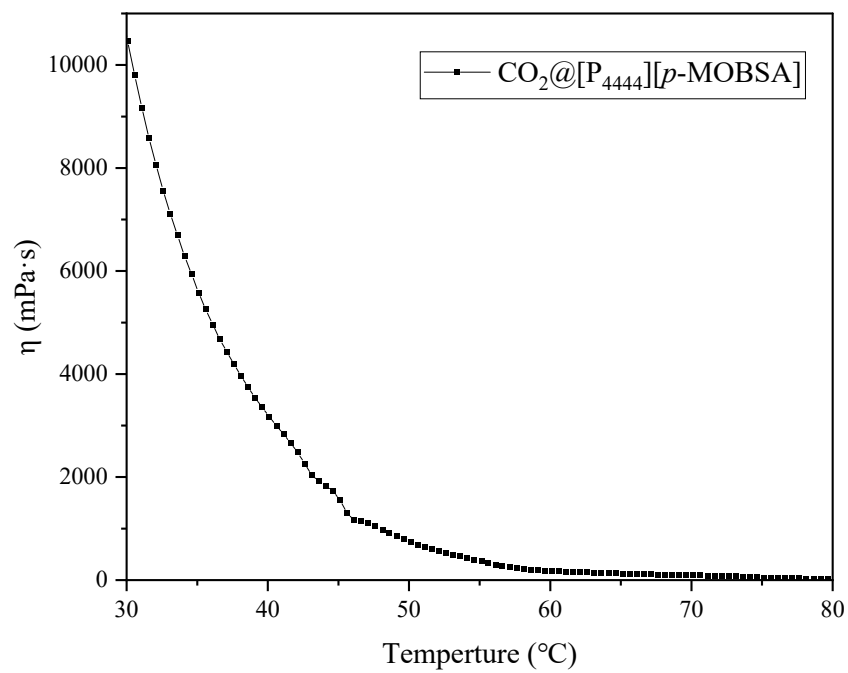

## 9. Mechanism of CO<sub>2</sub> absorption

Figure S26 (a) Stacked partial <sup>13</sup>C NMR spectra (400 MHz, DMSO-*d*<sub>6</sub>) of fresh (top), recovered [P<sub>4444</sub>] [p-MOBSA] (middle) and after CO<sub>2</sub> absorption (bottom); (b) Stacked partial FT-IR spectra of fresh (black), after CO<sub>2</sub> absorption (red), recovered after CO<sub>2</sub> absorption (blue) and recovered after cycloaddition reaction of [P<sub>4444</sub>] [p-MOBSA] (green). (c) Thermal stability of fresh (blue), recovered after CO<sub>2</sub> absorption (light green) and recovered after cycloaddition reaction of [P<sub>4444</sub>] [p-MOBSA].

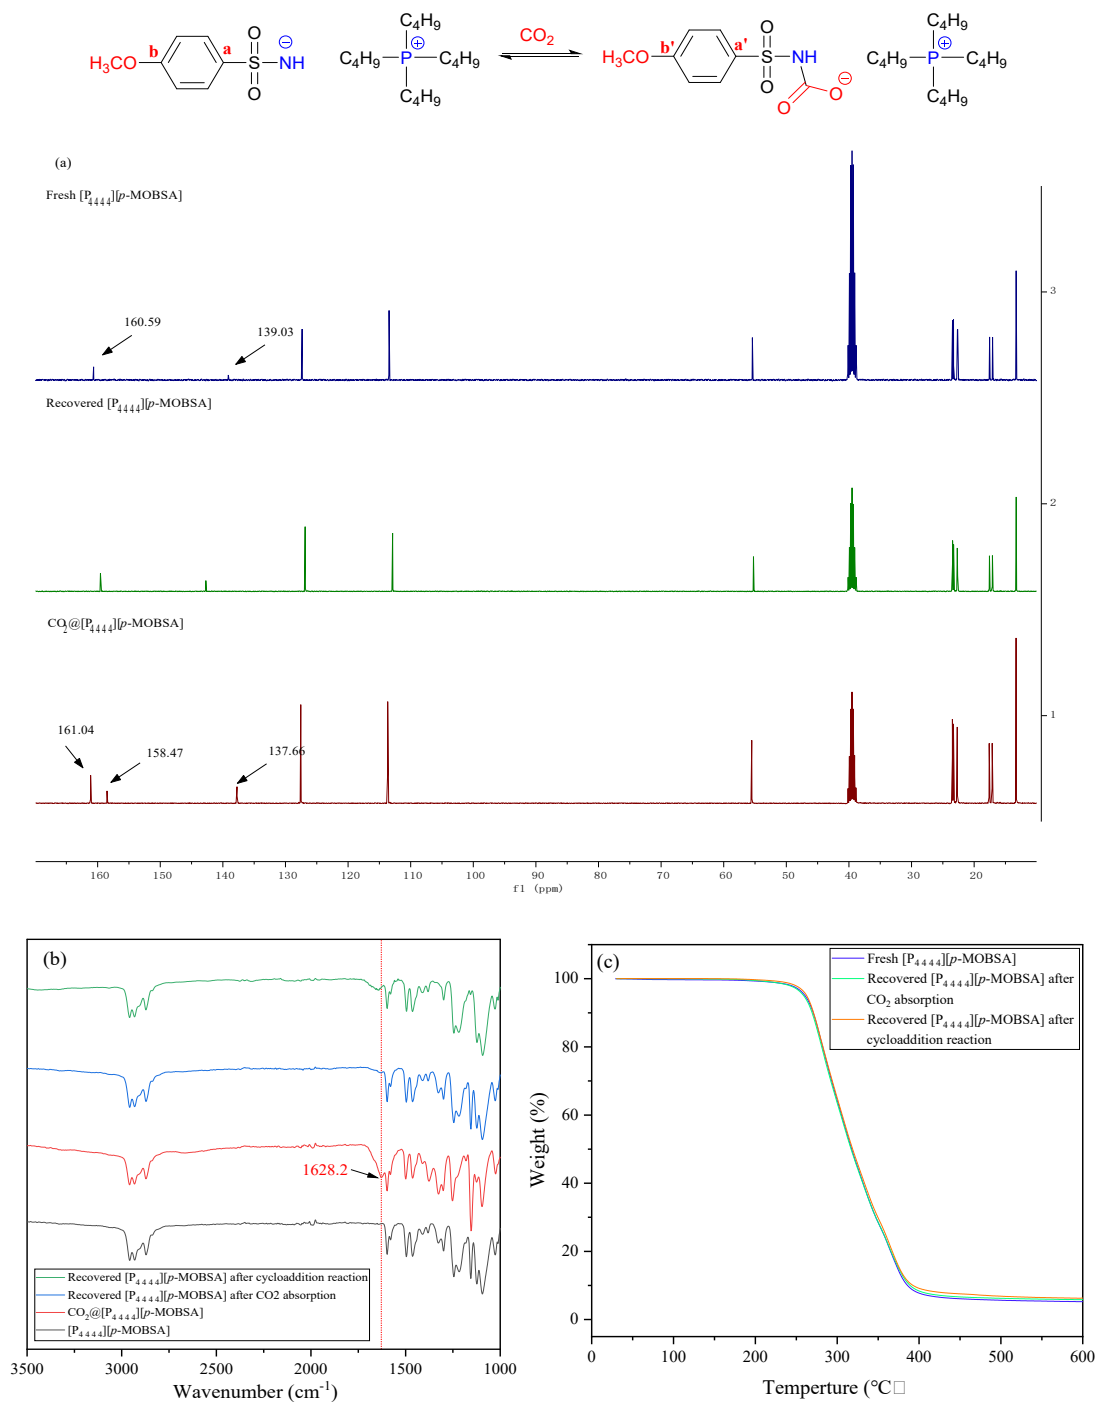

## 10. Recyclability of CO<sub>2</sub> conversion and calculation of E-factor

Figure S27 <sup>1</sup>H NMR of all cycles.

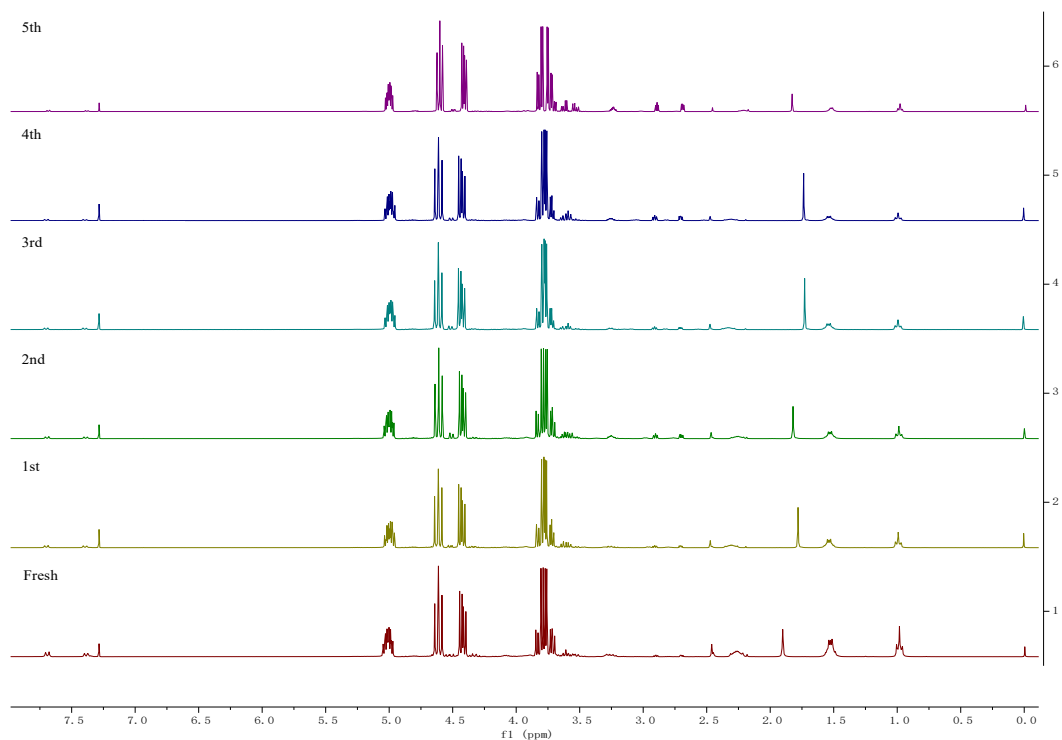

Figure S28  $^1\text{H}$  NMR of the 5<sup>th</sup> cycles.

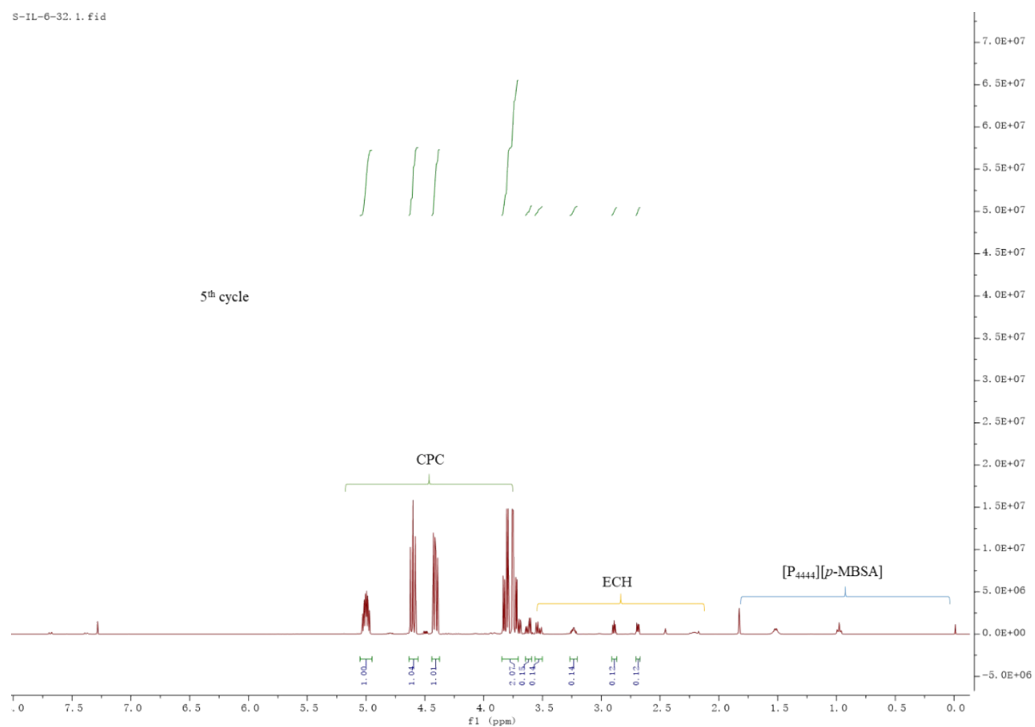

**Table S2**

Materials requirements and ECH residue for the cycloaddition reaction <sup>a</sup>.

| Material | Amount/mmol | Cycle <sup>b</sup> | ECH residue /% <sup>c</sup> |
|----------|-------------|--------------------|-----------------------------|
| ECH      | 10          | fresh              | 2.14                        |
| ECH      | 10          | 1                  | 3.46                        |

|                              |     |   |       |
|------------------------------|-----|---|-------|
| ECH                          | 10  | 2 | 6.51  |
| ECH                          | 10  | 3 | 3.82  |
| ECH                          | 10  | 4 | 7.10  |
| ECH                          | 10  | 5 | 10.71 |
| [P <sub>4444</sub> ][p-MBSA] | 0.2 |   |       |

<sup>a</sup> Reaction conditions: Epichlorohydrin (10 mmol), [P<sub>4 4 4 4</sub>] [p-MBSA] (0.2 mmol, 85.93 mg), 3 h, atmospheric CO<sub>2</sub> pressure, solvent-free conditions; <sup>b</sup> After the first catalytic cycle, add another 10 mmol ECH to the reaction mixture directly without separation; <sup>c</sup> Residue was confirmed by <sup>1</sup>H NMR.

$E$ -factor = mass of ECH residue + mass of BSA-IL / total mass of cyclic carbonate = 60 mmol \* 10.71% \* 92 g/mol + 0.08593 g / 60 mmol \* (1 - 10.71%) \* 136 g/mol = 0.11

**Table S3**

Large scale ECH conversion and CO<sub>2</sub> capture <sup>a</sup>.

| Amount/mmol | Cycle | Conversion /% | CO <sub>2</sub> capture mol/mol BSA-IL |
|-------------|-------|---------------|----------------------------------------|
| 60          | fresh | 95.2          | /                                      |
|             |       |               | 1.38                                   |

<sup>a</sup> Reaction conditions: Epichlorohydrin (60 mmol), [P<sub>4 4 4 4</sub>][p-MOBSA] (1.5 mmol, 668.5mg), atmospheric CO<sub>2</sub> pressure.

### 11. DFT calculations:

Figure S29 Calculated relative free energy diagrams for ECH-opening step initiated by [p-MBSA] anion (a) and [p-MBSA-CO<sub>2</sub>] anion (b); Surface charge density of [p-MBSA] anion (c) and [p-MBSA-CO<sub>2</sub>] anion (d).

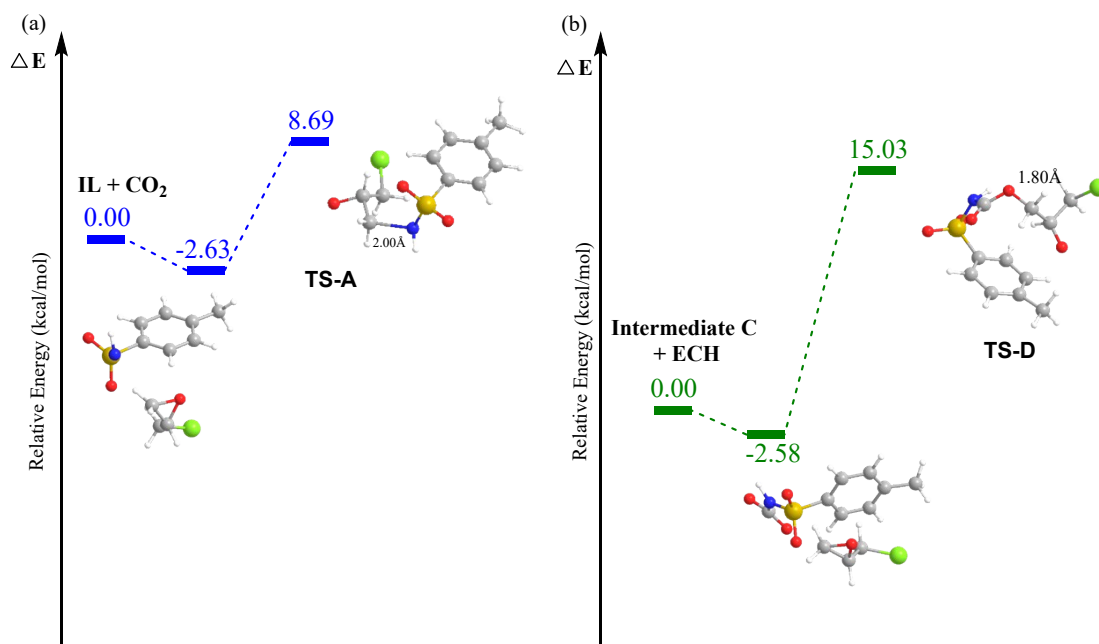

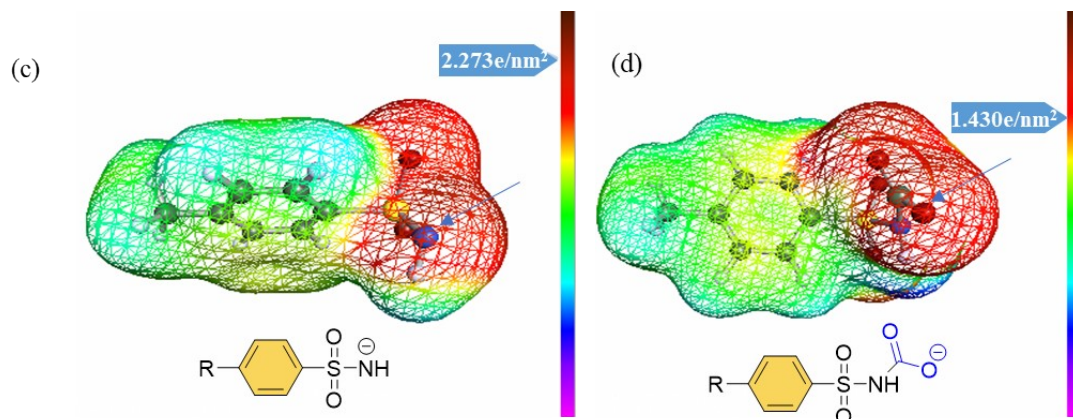

### 12. Diagram for CO<sub>2</sub> absorption-desorption-conversion:

Figure S30 (1) CO<sub>2</sub> gas cylinder, (2) N<sub>2</sub> gas cylinder, (3) pressure relief valve, (4) pressure gauge, (5) gas flow meter, (6) gas drying and buffering device, (7) CO<sub>2</sub> capture and conversion apparatus, (8) thermostatic heating and stirring device, (9) residual gas absorption bottle (off-gas was absorbed by NaOH solution).

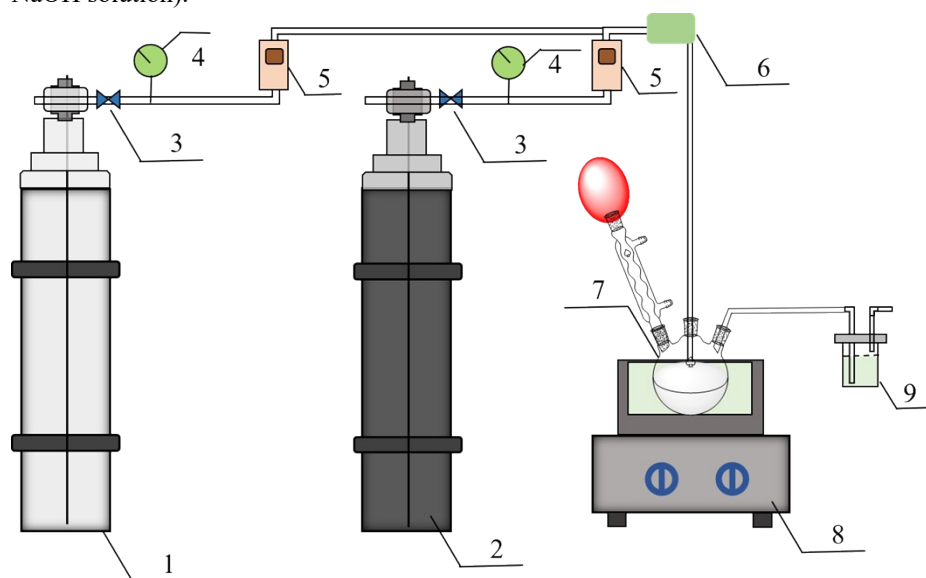

Supplement: d6gc01624c1.pdf [file d6gc01624c1.pdf]
